# Supplementary material for: Immunogenicity of a single-dose compared with a two-dose primary series followed by a booster dose of ten-valent or 13-valent pneumococcal conjugate vaccine in South African children: an open-label, randomised, non-inferiority trial
Source: PubMed Central journal article supplement (PMC7689288; doi:10.1016/s1473-3099(20)30289-9), 2020-12
Supplement: mmc1.pdf [file mmc1.pdf]

# THE LANCET Infectious Diseases

## Supplementary webappendix

This webappendix formed part of the original submission and has been peer reviewed. We post it as supplied by the authors.

Supplement to: Madhi SA, Mutsaert EAML, Izu A, et al. Immunogenicity of a single-dose compared with a two-dose primary series followed by a booster dose of ten-valent or 13-valent pneumococcal conjugate vaccine in South African children: an open-label, randomised, non-inferiority trial. *Lancet Infect Dis* 2020; published online Aug 25. [https://doi.org/10.1016/S1473-3099\(20\)30289-9](https://doi.org/10.1016/S1473-3099(20)30289-9).

**Supplementary text: Immunogenicity of a single compared to two-dose primary series followed by a booster dose of 10-valent or 13-valent pneumococcal conjugate vaccine in South African children: An open-label, randomised, non-inferiority trial.**

Shabir A Madhi,<sup>1,2</sup> Eleonora AML Mutsaerts\*,<sup>1,2</sup> Alane Izu,<sup>1,2</sup> Welekazi Boyce,<sup>1,2</sup> Sutika Bhikha,<sup>1,2</sup> Benit T Ikulinda,<sup>1,2</sup> Lisa Jose,<sup>1,2</sup> Anthonet Koen,<sup>1,2</sup> Amit J. Nana,<sup>1,2</sup> Andrew Moultrie,<sup>1,2</sup> Lucy Roalfe,<sup>3</sup> Adam Hunt,<sup>3</sup> David Goldblatt,<sup>3</sup> Clare L Cutland,<sup>1,2</sup>, Jeffrey R Dorfman\*<sup>1,2</sup>

<sup>1</sup> Medical Research Council: Respiratory and Meningeal Pathogens Research Unit, University of the Witwatersrand, Faculty of Health Science, Johannesburg, South Africa

<sup>2</sup> Department of Science/ National Research Foundation: Vaccine Preventable Diseases, University of the Witwatersrand, Faculty of Health Science, Johannesburg, South Africa

<sup>3</sup> Immunobiology Section, University College of London, Great Ormond Street Institute of Child Health Biomedical Research Centre, London, UK

Correspondence to: Professor Shabir A Madhi. RMPRU, 11<sup>th</sup> Floor, Central-West Wing, Chris Hani Baragwanath Academic Hospital, Chris Hani Road, Soweto, 2013, South Africa.

E-mail: [madhis@rmpru.co.za](mailto:madhis@rmpru.co.za)

Tel: +27-11-9834266

### **1.1. Inclusion and Exclusion criteria:**

Inclusion criteria included birth at  $\geq 37$  weeks gestation, birth weight  $\geq 2500$  grams and weighing  $\geq 3500$  grams at time of enrolment. Exclusion criteria included any clinically significant congenital abnormalities, any previous hospitalisation for respiratory illness or history confirmed pneumococcal disease since birth. Other exclusion criteria included receipt of any other investigational drug/vaccine, any previous history of PCV vaccination, known allergy to any of the vaccine components or febrile illness at time of enrolment, planned relocation outside of the study area up to age of two years, receipt of blood transfusion or any other blood products since birth, and any known or suspected immunodeficiency condition.

### **1.2. Vaccination of study participants**

Children received either two or three intramuscular injections (0.5 mL) of PCV10 (Synflorix<sup>®</sup>, GlaxoSmithKline, Rixensart, Belgium) or PCV13 (Pevnar-13<sup>®</sup>, Pfizer, New York City, United States) in the anterolateral thigh at the vaccination visits. In addition, children received routine vaccinations according to the South African public immunisation schedule: combined diphtheria, tetanus, pertussis, hepatitis B, poliomyelitis and *Haemophilus influenzae* type b conjugate vaccine (Hexaxim<sup>®</sup>, Sanofi Pasteur, Paris, France) at 6, 10, 14 weeks and 15 months of age, oral rotavirus vaccine (Merieux<sup>®</sup>, Institut Merieux, Lyon, France) at 6 and 14 weeks of age, and measles vaccine at 6 and 12 months of age (Measbio<sup>®</sup>, The Biovac Institute, Cape Town, South Africa). Participants were observed for 30 minutes after administration of each vaccine by a study doctor or nurse for immediate reactions.

### **1.3. Serotype antibody ELISA assay method**

All lots of reagents and 96 well plates were tested with the 12 WHO calibration sera and rejected if measured values did not conform to established values. Serotype-specific immunoglobulin G (IgG) concentrations were measured to all PCV13 capsular polysaccharides (1, 3, 4, 5, 6A, 6B, 7F, 9V, 14, 18C, 19A, 19F, and 23F) for all groups, PCV13 and PCV10 immunised. All serum samples were pre-adsorbed with cell wall polysaccharide, 22F polysaccharide and bovine serum albumin. Plates were coated with pre-tested amounts of serotype-specific carbohydrates (ATCC, Rockville, USA, and for serotype 1 also Statens Serum Institute, Copenhagen, Denmark), and were developed with alkaline phosphatase-conjugated secondary reagents (Life Technologies) that were pre-tested to confirm minimal reactivity to human IgM or IgA and equivalent reactivity to IgG subclasses. Reagents and 96 well plates were tested with the 12 WHO calibration sera (ref 17) and rejected if measured values did not conform to established values. Limits of detection (LODs) were

calculated for each ELISA plate lot and were all below 0.20µg/mL for all serotypes except 6A (range 0.14-0.25µg/mL) and 14 (range 0.13-0.28µg/mL). LODs for serotypes 3, 5 and 18C were all below 0.10µg/mL.<sup>1,4</sup> Additional secondary study objectives included:

- i. Reporting on the proportion of study participants with vaccine-serotype specific serum IgG antibody concentration above the serotype-specific correlate for invasive pneumococcal disease (IPD) proposed by Andrews et al.<sup>1</sup> Furthermore, we planned on comparing the proportion in each group with post-booster dose vaccine-serotype specific serum IgG antibody concentration above arbitrarily selected thresholds of  $\geq 0.5\mu\text{g/ml}$  and  $\geq 1.0\mu\text{g/ml}$  as an exploratory objective. Due to the density and complexity of data presented in the manuscript, we have limited only reporting statistics in relation to the WHO proposed putative threshold for correlate of protection ( $\geq 0.35\mu\text{g/ml}$ ) in this manuscript. Future publications will report on the alternate thresholds indicated above.
- ii. Furthermore, we also plan to report separately on the additional secondary objective comparing persistence of immunity measured at 18 months of age (i.e. 9 months post-booster; for which the antibody assay results are pending); to address the objective of analysing for the lower limit of the 95% confidence interval of the ratio of GMC of the 1+1 and 2+1 dosing schedules being  $>0.5$  for individual serotypes at 18 months of age.
- iii. The reporting for the secondary study objective comparing the PCV-1+1 to the PCV-2+1 dosing arms (stratified by PCV10 and PCV13) for prevalence of overall vaccine-serotype colonization at 9, 15 and 18 months of age will also be reported separately. The testing of the nasopharyngeal swab samples is currently underway using a novel multi-plex assay that has been undergoing expansion and validation at the site.<sup>2</sup>

**Supplementary Table S1: Immune responses one-month following the booster dose of 13-valent pneumococcal conjugate vaccine (PCV13) in children who received a single dose at six (6w+1-PCV13) or 14 (14w+1-PCV13) weeks of age, and infants who received two doses at 6 and 14 weeks (2+1-PCV13) of age.**

| Measurement | Serotype | 2+1-PCV13<br>n=92 <sup>a</sup> | 6w+1-PCV13<br>n=92 <sup>a</sup> | Compare 6wk+1-<br>PCV13 to 2+1-<br>PCV13 <sup>b</sup> | p-value <sup>b</sup> | 14w+1-PCV13<br>n=89 <sup>a</sup> | Compare 14wk+1-<br>PCV13 to 2+1-<br>PCV13 <sup>b</sup> | p-value <sup>b</sup> | Comparing 14w+1-<br>PCV13 to 6w+1-<br>PCV13 <sup>c</sup> | p-value <sup>c</sup> |
|-------------|----------|--------------------------------|---------------------------------|-------------------------------------------------------|----------------------|----------------------------------|--------------------------------------------------------|----------------------|----------------------------------------------------------|----------------------|
| GMC         | 1        | 7.0 (5.8-8.3)                  | 11.5 (9.1-14.5)                 | 1.66 (1.22-2.25)                                      | 0.0008               | 13.9 (11.4-16.9)                 | 2 (1.52-2.63)                                          | <0.0001              | 1.21 (0.88-1.66)                                         | 0.2229               |
|             | 3        | 0.66 (0.58-0.75)               | 1.0 (0.8-1.2)                   | 1.52 (1.19-1.94)                                      | 0.0005               | 0.65 (0.55-0.75)                 | 0.98 (0.79-1.21)                                       | 0.8253               | 0.64 (0.5-0.83)                                          | 0.0005               |
|             | 4        | 4.7 (3.9-5.6)                  | 9.3 (7.6-11.4)                  | 1.97 (1.48-2.61)                                      | <0.0001              | 6 (5-7.2)                        | 1.27 (0.98-1.65)                                       | 0.0590               | 0.65 (0.49-0.86)                                         | 0.0016               |
|             | 5        | 4.9 (4.2-5.9)                  | 4.4 (3.5-5.6)                   | 0.89 (0.66-1.21)                                      | 0.4402               | 6.5 (5.3-8)                      | 1.31 (0.99-1.74)                                       | 0.0485               | 1.47 (1.06-2.03)                                         | 0.0151               |
|             | 6A       | 10.2 (8.4-12.4)                | 7.8 (6.1-10)                    | 0.77 (0.55-1.07)                                      | 0.0980               | 8 (6.3-10.2)                     | 0.79 (0.57-1.09)                                       | 0.1286               | 1.03 (0.72-1.47)                                         | 0.8815               |
|             | 6B       | 9.1 (7.4-11.3)                 | 2.2 (1.7-2.9)                   | 0.24 (0.17-0.35)                                      | <0.0001              | 4 (3-5.3)                        | 0.44 (0.3-0.63)                                        | <0.0001              | 1.81 (1.18-2.76)                                         | 0.0044               |
|             | 7F       | 7.6 (6.5-8.9)                  | 6.4 (5.3-7.7)                   | 0.84 (0.65-1.08)                                      | 0.1468               | 5.1 (4.4-5.9)                    | 0.67 (0.53-0.84)                                       | 0.0003               | 0.80 (0.62-1.03)                                         | 0.0702               |
|             | 9V       | 5.2 (4.2-6.3)                  | 5.6 (4.6-6.8)                   | 1.09 (0.81-1.46)                                      | 0.5455               | 5.2 (4.4-6.2)                    | 1.02 (0.77-1.34)                                       | 0.9067               | 0.93 (0.71-1.23)                                         | 0.6010               |
|             | 14       | 10.4 (8.4-12.9)                | 6.9 (4.9-9.7)                   | 0.66 (0.44-1.01)                                      | 0.0448               | 8.2 (6.5-10.4)                   | 0.79 (0.57-1.1)                                        | 0.1450               | 1.19 (0.77-1.83)                                         | 0.4021               |
|             | 18C      | 3.5 (2.9-4.1)                  | 3.2 (2.6-3.9)                   | 0.92 (0.69-1.23)                                      | 0.5536               | 2.4 (2-2.8)                      | 0.69 (0.54-0.89)                                       | 0.0029               | 0.75 (0.57-0.99)                                         | 0.0333               |
|             | 19A      | 5.7 (4.7-7)                    | 8.2 (6.3-10.5)                  | 1.42 (1.02-1.98)                                      | 0.0284               | 7.8 (6.3-9.7)                    | 1.37 (1.01-1.85)                                       | 0.0329               | 0.96 (0.68-1.36)                                         | 0.8140               |
|             | 19F      | 5.7 (4.8-6.9)                  | 10.1 (7.6-13.5)                 | 1.76 (1.24-2.52)                                      | 0.0012               | 9.5 (7.3-12.3)                   | 1.66 (1.2-2.3)                                         | 0.0016               | 0.94 (0.63-1.41)                                         | 0.7539               |
|             | 23F      | 5.8 (4.6-7.2)                  | 3.0 (2.3-4.0)                   | 0.53 (0.37-0.76)                                      | 0.0003               | 3.8 (3-4.8)                      | 0.66 (0.47-0.92)                                       | 0.0102               | 1.24 (0.86-1.79)                                         | 0.2234               |
| ≥0.35       | 1        | 92; 100 (96.0-100)             | 91; 98.9 (94.1-99.8)            | -1.09 (-4.81 - 2.69)                                  | >0.9999              | 88; 98.9 (93.9-99.8)             | -1.12 (-4.97 - 2.7)                                    | 0.4917               | 0.04 (-4.32 - 4.46)                                      | >0.9999              |
|             | 3        | 79; 85.9 (77.3-91.6)           | 79; 85.9 (77.3-91.6)            | 0 (-10.67 - 10.67)                                    | >0.9999              | 71; 79.8 (70.3-86.8)             | -6.09 (-17.54 - 5.57)                                  | 0.3261               | 6.09 (-5.57 - 17.54)                                     | 0.3261               |
|             | 4        | 92; 100 (96.0-100)             | 92; 100 (96.0-100)              | 0 (-3.07 - 3.07)                                      | >0.9999              | 89; 100 (95.9-100)               | 0 (-3.16 - 3.09)                                       | >0.9999              | 0 (-3.09 - 3.16)                                         | >0.9999              |
|             | 5        | 92; 100 (96.0-100)             | 90; 97.8 (92.4-99.4)            | -2.17 (-6.44 - 2.18)                                  | 0.4973               | 89; 100 (95.9-100)               | 0 (-3.16 - 3.09)                                       | >0.9999              | -2.17 (-6.44 - 2.25)                                     | 0.4974               |

|     |                      |                      |                          |         |                      |                       |         |                       |         |
|-----|----------------------|----------------------|--------------------------|---------|----------------------|-----------------------|---------|-----------------------|---------|
| 6A  | 92; 100 (96.0-100)   | 89; 96.7 (90.8-98.9) | -3.26 (-7.99 - 1.6)      | 0.0008  | 86; 96.6 (90.6-98.8) | -3.37 (-8.25 - 1.59)  | 0.1168  | 0.11 (-6 - 6.29)      | >0.9999 |
| 6B  | 91; 98.9 (94.1-99.8) | 81; 88.0 (79.8-93.2) | -10.87 (-18.34 to -2.94) | 0.0005  | 84; 94.4 (87.5-97.6) | -4.53 (-10.62 - 1.69) | 0.1138  | -6.34 (-15.03 - 2.69) | 0.1903  |
| 7F  | 92; 100 (96.0-100)   | 91; 98.9 (94.1-99.8) | -1.09 (-4.81 - 2.69)     | <0.0001 | 89; 100 (95.9-100)   | 0 (-3.16 - 3.09)      | >0.9999 | -1.09 (-4.82 - 2.76)  | >0.9999 |
| 9V  | 90; 97.8 (92.4-99.4) | 92; 100 (96.0-100)   | 2.17 (-2.18 - 6.44)      | 0.4402  | 89; 100 (95.9-100)   | 2.17 (-2.25 - 6.44)   | 0.4974  | 0 (-3.09 - 3.16)      | >0.9999 |
| 14  | 92; 100 (96.0-100)   | 87; 94.6 (87.9-97.7) | -5.43 (-10.93 - 0.3)     | 0.0980  | 89; 100 (95.9-100)   | 0 (-3.16 - 3.09)      | >0.9999 | -5.43 (-10.93 - 0.36) | 0.0592  |
| 18C | 91; 98.9 (94.1-99.8) | 89; 96.7 (90.8-98.9) | -2.17 (-7.38 - 3.13)     | <0.0001 | 88; 98.9 (93.9-99.8) | -0.04 (-4.46 - 4.32)  | >0.9999 | -2.14 (-7.37 - 3.26)  | 0.6210  |
| 19A | 92; 100 (96.0-100)   | 92; 100 (96.0-100)   | 0 (-3.07 - 3.07)         | 0.1468  | 89; 100 (95.9-100)   | 0 (-3.16 - 3.09)      | >0.9999 | 0 (-3.09 - 3.16)      | >0.9999 |
| 19F | 92; 100 (96.0-100)   | 90; 97.8 (92.4-99.4) | -2.17 (-6.44 - 2.18)     | 0.5455  | 87; 97.8 (92.2-99.4) | -2.25 (-6.65 - 2.18)  | 0.2404  | 0.07 (-5.25 - 5.46)   | >0.9999 |
| 23F | 90; 97.8 (92.4-99.4) | 88; 95.7 (89.3-98.3) | -2.17 (-8.17 - 3.91)     | 0.0448  | 88; 98.9 (93.9-99.8) | 1.05 (-3.89 - 5.87)   | >0.9999 | -3.22 (-8.83 - 2.58)  | 0.3683  |

<sup>a</sup>GMC (96% CI) or number over 0.35µg/ml threshold; percentage over 0.35µg/ml threshold (96% CI)

<sup>b</sup>Comparison between 6wk+1-PCV13 or 14wk+1-PCV13 and 2+1-PCV13; GMC compared by ratio between 1+1 / 2+1; percentages compared by difference in percentages above specific threshold between 1+1 and 2+1.

<sup>c</sup>Comparison between 14wk+1-PCV13 and 6wk+1-PCV13; GMC compared by ratio between 14wk/6wk; percentages compared by difference in percentages above specific threshold between 14wk and 6wk (14wk-6wk).

Noninferiority criterion: When comparing GMCs, non-inferiority is shown when the lower limit of the 96% CI of the ratio of GMCs is >0.5 for 10 of the 13 serotypes. When comparing percentages, non-inferiority is shown when the lower limit of the 96% CI of the risk difference is >-10% 10 of the 13 serotypes. .

**Supplementary Table S2: Immune responses one-month following the booster dose of 10-valent pneumococcal conjugate vaccine (PCV10) in children who received a single dose at six (6w+1-PCV10) or 14 (14w+1-PCV10) weeks of age, and infants who received two doses at 6 and 14 weeks (2+1-PCV10) of age.**

| Measurement | Serotype | 2+1-PCV10<br>n=90 <sup>a</sup> | 6w+1-PCV10 n=93 <sup>a</sup> | Compare 6wk+1-<br>PCV10 to 2+1-<br>PCV10 <sup>b</sup> | p-value <sup>b</sup> | 14w+1-PCV10<br>n=86 <sup>a</sup> | Compare 14wk+1-<br>PCV10 to 2+1-<br>PCV10 <sup>b</sup> | p-value <sup>b</sup> | Comparing 14w+1-<br>PCV10 to 6w+1-<br>PCV10 <sup>c</sup> | p-value <sup>c</sup> |
|-------------|----------|--------------------------------|------------------------------|-------------------------------------------------------|----------------------|----------------------------------|--------------------------------------------------------|----------------------|----------------------------------------------------------|----------------------|
| GMC         | 1        | 5.6 (4.4-7.1)                  | 6.2 (5.0-7.7)                | 1.1 (0.8-1.53)                                        | 0.5328               | 6 (4.9-7.4)                      | 1.07 (0.78-1.48)                                       | 0.6596               | 0.97 (0.71-1.32)                                         | 0.8382               |
|             | 3*       | 0.09 (0.07-0.12)               | 0.12 (0.09-0.15)             | 1.3 (0.93-1.82)                                       | 0.1117               | 0.13 (0.1-0.16)                  | 1.37 (0.97-1.93)                                       | 0.0641               | 1.05 (0.74-1.5)                                          | 0.7681               |
|             | 4        | 4.7 (3.7-5.8)                  | 6.8 (5.5-8.4)                | 1.46 (1.06-2)                                         | 0.0140               | 7.1 (5.8-8.7)                    | 1.52 (1.11-2.09)                                       | 0.0068               | 1.04 (0.77-1.41)                                         | 0.7801               |
|             | 5        | 3.0 (2.4-3.7)                  | 3.7 (2.8-4.7)                | 1.23 (0.86-1.77)                                      | 0.2280               | 4.7 (3.9-5.7)                    | 1.58 (1.16-2.16)                                       | 0.0026               | 1.28 (0.91-1.8)                                          | 0.1307               |
|             | 6A*      | 0.42 (0.31-0.57)               | 0.33 (0.25-0.42)             | 0.78 (0.51-1.18)                                      | 0.2134               | 0.38 (0.29-0.48)                 | 0.9 (0.6-1.36)                                         | 0.5985               | 1.16 (0.8-1.68)                                          | 0.4197               |
|             | 6B       | 5.7 (4.6-7)                    | 4.6 (3.7-5.8)                | 0.81 (0.59-1.11)                                      | 0.1726               | 4.7 (3.7-5.8)                    | 0.82 (0.6-1.12)                                        | 0.1944               | 1.01 (0.72-1.41)                                         | 0.9540               |
|             | 7F       | 3.8 (3.2-4.5)                  | 3.6 (3.0-4.2)                | 0.93 (0.73-1.19)                                      | 0.5527               | 3.8 (3.3-4.4)                    | 1 (0.8-1.25)                                           | 0.9836               | 1.07 (0.85-1.35)                                         | 0.5467               |
|             | 9V       | 3.9 (3.2-4.8)                  | 3.8 (3.1-4.6)                | 0.95 (0.71-1.27)                                      | 0.7246               | 3.4 (2.9-4)                      | 0.86 (0.66-1.12)                                       | 0.2488               | 0.91 (0.7-1.18)                                          | 0.4407               |
|             | 14       | 5.9 (4.2-8.2)                  | 5.7 (4.2-7.9)                | 0.98 (0.6-1.58)                                       | 0.9177               | 7.4 (5.8-9.5)                    | 1.26 (0.82-1.95)                                       | 0.2637               | 1.29 (0.84-1.99)                                         | 0.2124               |
|             | 18C      | 3.9 (3.3-4.7)                  | 2.9 (2.5-3.5)                | 0.75 (0.57-0.97)                                      | 0.0224               | 3.4 (2.7-4.2)                    | 0.86 (0.64-1.15)                                       | 0.2857               | 1.15 (0.87-1.53)                                         | 0.3065               |
|             | 19A*     | 0.50 (0.37-0.70)               | 0.58 (0.43-0.79)             | 1.15 (0.72-1.83)                                      | 0.5334               | 0.64 (0.46-0.88)                 | 1.27 (0.79-2.04)                                       | 0.3059               | 1.10 (0.69-1.76)                                         | 0.6692               |
|             | 19F      | 4.9 (4.0-6.1)                  | 7.4 (5.5-9.9)                | 1.51 (1.03-2.2)                                       | 0.0266               | 4.7 (3.3-6.5)                    | 0.95 (0.62-1.44)                                       | 0.7880               | 0.63 (0.4-1)                                             | 0.0396               |
|             | 23F      | 3.3 (2.8-3.9)                  | 2.6 (2.1-3.2)                | 0.79 (0.59-1.06)                                      | 0.0945               | 3.5 (2.9-4.3)                    | 1.07 (0.81-1.41)                                       | 0.6387               | 1.35 (0.99-1.84)                                         | 0.0497               |
| >=0.35      | 1        | 89; 98.9 (94.0-99.8)           | 93; 100 (96.0-100)           | 1.11 (-2.67 - 4.91)                                   | 0.4918               | 85; 98.8 (93.7-99.8)             | -0.05 (-4.61 - 4.42)                                   | >0.9999              | 1.16 (-2.69 - 5.13)                                      | 0.4804               |
|             | 3*       | 6; 6.7 (3.1-13.8)              | 15; 16.1 (10.0-24.9)         | 9.46 (-0.48 - 18.95)                                  | 0.0623               | 13; 15.1 (9.1-24.2)              | 8.45 (-1.52 - 18.12)                                   | 0.0900               | 1.01 (-10.31 - 12.17)                                    | >0.9999              |
|             | 4        | 89; 98.9 (94.0-99.8)           | 92; 98.9 (94.2-99.8)         | 0.04 (-4.28 - 4.42)                                   | >0.9999              | 85; 98.8 (93.7-99.8)             | -0.05 (-4.61 - 4.42)                                   | >0.9999              | 0.09 (-4.28 - 4.62)                                      | >0.9999              |
|             | 5        | 87; 96.7 (90.7-98.9)           | 89; 95.7 (89.5-98.3)         | -0.97 (-7.33 - 5.5)                                   | >0.9999              | 86; 100 (95.7-100)               | 3.33 (-1.73 - 8.16)                                    | 0.2461               | -4.30 (-9.37 - 1.12)                                     | 0.1219               |

|      |                      |                      |                        |         |                      |                          |         |                       |         |
|------|----------------------|----------------------|------------------------|---------|----------------------|--------------------------|---------|-----------------------|---------|
| 6A*  | 42; 46.7 (36.7-56.9) | 39; 41.9 (32.4-52.1) | -4.73 (-19.55 - 10.28) | 0.5537  | 41; 47.7 (37.4-58.1) | 1.01 (-14.3 - 16.28)     | >0.9999 | -5.74 (-20.72 - 9.47) | 0.4558  |
| 6B   | 88; 97.8 (92.3-99.4) | 89; 95.7 (89.5-98.3) | -2.08 (-8.05 - 4.05)   | 0.6825  | 83; 96.5 (90.2-98.8) | -1.27 (-7.22 - 4.65)     | 0.6769  | -0.81 (-7.27 - 5.83)  | >0.9999 |
| 7F   | 90; 100 (95.9-100)   | 93; 100 (96.0-100)   | 0 (-3.06 - 3.13)       | >0.9999 | 86; 100 (95.7-100)   | 0 (-3.26 - 3.16)         | >0.9999 | 0 (-3.08 - 3.25)      | >0.9999 |
| 9V   | 87; 96.7 (90.7-98.9) | 92; 98.9 (94.2-99.8) | 2.26 (-3.07 - 7.55)    | 0.3627  | 85; 98.8 (93.7-99.8) | 2.17 (-3.38 - 7.53)      | 0.6211  | 0.09 (-4.28 - 4.62)   | >0.9999 |
| 14   | 83; 92.2 (84.8-96.2) | 84; 90.3 (82.6-94.8) | -1.9 (-10.67 - 7.01)   | 0.7949  | 83; 96.5 (90.2-98.8) | 4.29 (-3.41 - 11.71)     | 0.3307  | -6.19 (-13.89 - 1.93) | 0.1361  |
| 18C  | 88; 97.8 (92.3-99.4) | 92; 98.9 (94.2-99.8) | 1.15 (-3.7 - 6.01)     | 0.6168  | 85; 98.8 (93.7-99.8) | 1.06 (-4.02 - 6)         | >0.9999 | 0.09 (-4.28 - 4.62)   | >0.9999 |
| 19A* | 46; 51.1 (41.0-61.2) | 57; 61.3 (51.1-70.6) | 10.18 (-4.87 - 24.8)   | 0.1819  | 55; 64 (53.4-73.3)   | 12.84 (-2.47 - 27.57)    | 0.0951  | -2.66 (-17.3 - 12.13) | 0.7585  |
| 19F  | 89; 98.9 (94.0-99.8) | 90; 96.8 (90.9-98.9) | -2.11 (-7.3 - 3.22)    | 0.6211  | 76; 88.4 (79.9-93.6) | -10.52 (-18.21 to -2.44) | 0.0042  | 8.4 (-0.1 - 16.68)    | 0.0422  |
| 23F  | 89; 98.9 (94.0-99.8) | 89; 95.7 (89.5-98.3) | -3.19 (-8.74 - 2.56)   | 0.3684  | 84; 97.7 (91.9-99.4) | -1.21 (-6.29 - 3.82)     | 0.6144  | -1.98 (-8.01 - 4.3)   | 0.6836  |

<sup>a</sup>GMC (96% CI) or number over 0.35µg/ml threshold; percentage over 0.35µg/ml threshold (96% CI)

<sup>b</sup>Comparison between 6wk+1-PCV10 or 14wk+1-PCV10 and 2+1-PCV10; GMC compared by ratio between 1+1 / 2+1; percentages compared by difference in percentages above specific threshold between 1+1 and 2+1.

<sup>c</sup>Comparison between 14wk+1-PCV10 and 6wk+1-PCV10; GMC compared by ratio between 14wk/6wk; percentages compared by difference in percentages above specific threshold between 14wk and 6wk (14wk-6wk).

Noninferiority criterion: When comparing GMCs, non-inferiority is shown when the lower limit of the 96% CI of the ratio of GMCs is >0.5 for 8 of the 10 vaccine serotypes. When comparing percentages, non-inferiority is shown when the lower limit of the 96% CI of the risk difference is >-10% for 8 of the 10 vaccine serotypes.

\*Serotypes not included in PCV10 formulation



**Supplementary Table S3: Opsonophagocytic activity assay (OPA) titers one-month following the booster dose of 13-valent (PCV13) or 10-valent pneumococcal conjugate vaccine (PCV10) in children in children who received a single dose at six (6w+1-PCV) or 14 (14w+1-PCV) weeks of age, and infants who received two doses at 6 and 14 weeks (2+1-PCV).**

| Measurement | 13-valent PCV |                                   |                                    | 10-valent PCV                    |          |                                   |                                    |                                  |
|-------------|---------------|-----------------------------------|------------------------------------|----------------------------------|----------|-----------------------------------|------------------------------------|----------------------------------|
|             | Serotype      | 6w+1-PCV13 <sup>a,b</sup><br>n=20 | 14w+1-PCV13 <sup>a,b</sup><br>n=19 | 2+1-PCV13 <sup>a,b</sup><br>n=20 | Serotype | 6w+1-PCV10 <sup>a,b</sup><br>n=20 | 14w+1-PCV10 <sup>a,b</sup><br>n=19 | 2+1-PCV10 <sup>a,b</sup><br>n=19 |
| GMT         | 1             | 169 (85-338)                      | 604 (351-1041)                     | 212 (117-383)                    | 1        | 158 (72-345) n=18                 | 267 (164-434)                      | 196 (88-438) n=18                |
|             | 3             | 157 (99-249)                      | 75 (46-122)                        | 93 (63-137)                      | 3*       | 4 (4-5)                           | 4 (4-4) n=17                       | 4 (4-4)                          |
|             | 4             | 3026 (1883-4864)                  | 3019 (2003-4550) n=18              | 2033 (1273-3245)                 | 4        | 1140 (684-1900) n=18              | 1508 (1019-2231) n=17              | 993 (651-1515) n=15              |
|             | 5             | 325 (200-528)                     | 1003 (592-1698)                    | 668 (401-1113)                   | 5        | 401 (192-836)                     | 1127 (714-1779)                    | 645 (368-1132)                   |
|             | 6A            | 2930 (1630-5267) n=19             | 3656 (2256-5924) n=18              | 6064 (4097-8976)                 | 6A*      | 25 (8-86) n=19                    | 62 (16-242) n=18                   | 35 (9-129) n=18                  |
|             | 6B            | 906 (377-2180) n=19               | 1636 (858-3121) n=18               | 2213 (1537-3188)                 | 6B       | 611 (359-1041)                    | 941 (626-1414) n=17                | 722 (351-1489) n=17              |
|             | 7F            | 3547 (2349-5356)                  | 3927 (2444-6310)                   | 10481 (6926-15862)               | 7F       | 1346 (1036-1749) n=19             | 2016 (1381-2943)                   | 1828 (1272-2626)                 |
|             | 9V            | 2082 (1316-3293) n=19             | 1586 (809-3107)                    | 3070 (1983-4752)                 | 9V       | 368 (197-687)                     | 870 (552-1371)                     | 550 (289-1048)                   |
|             | 14            | 4292 (2281-8076)                  | 2112 (1184-3769) n=18              | 2496 (1785-3490)                 | 14       | 1247 (577-2697) n=19              | 1445 (928-2249) n=17               | 1245 (521-2976) n=18             |
|             | 18C           | 1554 (1010-2391)                  | 1406 (899-2201)                    | 3256 (1923-5512)                 | 18C      | 2002 (1304-3075)                  | 2094 (936-4684)                    | 2626 (1693-4073)                 |
|             | 19A           | 1581 (868-2878)                   | 1073 (571-2018)                    | 1765 (1045-2982)                 | 19A*     | 55 (21-141) n=19                  | 40 (13-128) n=18                   | 30 (11-78)                       |
|             | 19F           | 1222 (414-3609)                   | 1520 (679-3403)                    | 1696 (1094-2629)                 | 19F      | 795 (340-1861)                    | 469 (142-1556)                     | 1058 (765-1463)                  |
|             | 23F           | 3325 (1379-8017)                  | 3762 (1910-7408) n=18              | 12328 (6849-22189)               | 23F      | 716 (332-1543)                    | 1068 (749-1521) n=18               | 991 (687-1430)                   |
| >=8         | 1             | 19; 95.0 (76.4-99.1)              | 19; 100 (83.2-100)                 | 20; 100 (83.9-100)               | 1        | 17; 94.4 (74.2-99) n=18           | 19; 100 (83.2-100)                 | 17; 94.4 (74.2-99) n=18          |
| >=8         | 3             | 20; 100 (83.9-100)                | 19; 100 (83.2-100)                 | 20; 100 (83.9-100)               | 3*       | 2; 10.0 (2.8-30.1)                | 0; 0 (0-18.4) n=17                 | 0; 0 (0 -16.8)                   |
| >=10        | 4             | 20; 100 (83.9-100)                | 18; 100 (82.4-100) n=18            | 20; 100 (83.9-100)               | 4        | 18; 100 (82.4-100) n=18           | 17; 100 (81.6-100) n=17            | 15; 100 (79.6-100) n=15          |
| >=8         | 5             | 20; 100 (83.9-100)                | 19; 100 (83.2-100)                 | 20; 100 (83.9-100)               | 5        | 20; 100 (83.9-100)                | 19; 100 (83.2-100)                 | 19; 100 (83.2-100)               |
| >=8         | 6A            | 19; 100 (83.2-100) n=19           | 18; 100 (82.4-100) n=18            | 20; 100 (83.9-100)               | 6A*      | 9; 47.4 (27.3-68.3) n=19          | 11; 61.1 (38.6-79.7) n=18          | 8; 44.4 (24.6-66.3) n=18         |

|      |     |                           |                         |                    |      |                           |                           |                         |
|------|-----|---------------------------|-------------------------|--------------------|------|---------------------------|---------------------------|-------------------------|
| >=15 | 6B  | 18; 94.7 (75.4-99.1) n=19 | 18; 100 (82.4-100) n=18 | 20; 100 (83.9-100) | 6B   | 19; 95.0 (76.4-99.1)      | 17; 100 (81.6-100) n=17   | 16; 94.1 (73.0-99) n=17 |
| >=8  | 7F  | 20; 100 (83.9-100)        | 19; 100 (83.2-100)      | 20; 100 (83.9-100) | 7F   | 19; 100 (83.2-100) n=19   | 19; 100 (83.2-100)        | 19; 100 (83.2-100)      |
| >=20 | 9V  | 19; 100 (83.2-100) n=19   | 19; 100 (83.2-100)      | 20; 100 (83.9-100) | 9V   | 19; 95.0 (76.4-99.1)      | 19; 100 (83.2-100)        | 18; 94.7 (75.4-99.1)    |
| >=8  | 14  | 20; 100 (83.9-100)        | 18; 100 (82.4-100) n=18 | 20; 100 (83.9-100) | 14   | 18; 94.7 (75.4-99.1) n=19 | 17; 100 (81.6-100) n=17   | 18; 100 (82.4-100) n=18 |
| >=8  | 18C | 20; 100 (83.9-100)        | 19; 100 (83.2-100)      | 20; 100 (83.9-100) | 18C  | 20; 100 (83.9-100)        | 18; 94.7 (75.4-99.1)      | 19; 100 (83.2-100)      |
| >=8  | 19A | 20; 100 (83.9-100)        | 19; 100 (83.2-100)      | 20; 100 (83.9-100) | 19A* | 14; 73.7 (51.2-88.2) n=19 | 12; 66.7 (43.7-83.7) n=18 | 12; 63.2 (41.0-80.9)    |
| >=8  | 19F | 18; 90 (69.9-97.2)        | 18; 94.7 (75.4-99.1)    | 20; 100 (83.9-100) | 19F  | 19; 95.0 (76.4-99.1)      | 17; 89.5 (68.6-97.1)      | 19; 100 (83.2-100)      |
| >=19 | 23F | 19; 95 (76.4-99.1)        | 18; 100 (82.4-100) n=18 | 20; 100 (83.9-100) | 23F  | 18; 90.0 (69.9-97.2)      | 18; 100 (82.4-100) n=18   | 19; 100 (83.2-100)      |

<sup>a</sup>number over specified threshold; percentage over specified threshold (96% CI)

<sup>b</sup>number of samples analysed is noted with "n=" if not all samples were analysed for that serotype in that group.

\*Serotypes not included in PCV10 formulation

**Supplementary Table S4: Immune responses following the post-primary series of 13-valent pneumococcal conjugate vaccine (PCV13) in children receiving a single dose at six (6w+1-PCV13) or 14 (14w+1-PCV13) weeks of age, and infants receiving two doses at 6 and 14 weeks of age (2+1-PCV13).**

| Measurement | Serotype | 2+1-PCV13<br>n=95 <sup>a</sup> | 6w+1-PCV13<br>n=93 <sup>a</sup> | Compared 6wk+1-<br>PCV13 to 2+1-<br>PCV13 <sup>b</sup> | p-value <sup>b</sup> | 14w+1-PCV13<br>n=92 <sup>a</sup> | Compare 14wk+1-<br>PCV13 to 2+1-<br>PCV13 <sup>b</sup> | p-value <sup>b</sup> | Comparing 14w+1-<br>PCV13 to 6w+1-<br>PCV13 <sup>c</sup> | p-value <sup>c</sup> |
|-------------|----------|--------------------------------|---------------------------------|--------------------------------------------------------|----------------------|----------------------------------|--------------------------------------------------------|----------------------|----------------------------------------------------------|----------------------|
| GMC         | 1        | 2.7 (2.2-3.3)                  | 0.70 (0.56-0.88)                | 0.26 (0.19-0.36)                                       | <0.0001              | 1.4 (1.1-1.7)                    | 0.5 (0.37-0.68)                                        | <0.0001              | 1.93 (1.41-2.64)                                         | <0.0001              |
|             | 3        | 0.60 (0.52-0.68)               | 0.63 (0.54-0.73)                | 1.05 (0.85-1.31)                                       | 0.6174               | 0.96 (0.83-1.11)                 | 1.61 (1.31-1.98)                                       | <0.0001              | 1.53 (1.22-1.91)                                         | 0.0001               |
|             | 4        | 1.9 (1.5-2.4)                  | 0.24 (0.19-0.30)                | 0.13 (0.09-0.18)                                       | <0.0001              | 0.58 (0.45-0.74)                 | 0.3 (0.21-0.43)                                        | <0.0001              | 2.41 (1.7-3.41)                                          | <0.0001              |
|             | 5        | 1.5 (1.2-1.8)                  | 0.32 (0.25-0.41)                | 0.22 (0.16-0.31)                                       | <0.0001              | 0.53 (0.41-0.68)                 | 0.36 (0.26-0.51)                                       | <0.0001              | 1.64 (1.14-2.35)                                         | 0.0055               |
|             | 6A       | 1.4 (1.0-1.8)                  | 0.14 (0.12-0.17)                | 0.1 (0.07-0.15)                                        | <0.0001              | 0.13 (0.11-0.15)                 | 0.1 (0.07-0.14)                                        | <0.0001              | 0.92 (0.72-1.17)                                         | 0.4820               |
|             | 6B       | 0.52 (0.38-0.70)               | 0.10 (0.08-0.11)                | 0.19 (0.13-0.27)                                       | <0.0001              | 0.08 (0.07-0.09)                 | 0.15 (0.11-0.22)                                       | <0.0001              | 0.82 (0.66-1.03)                                         | 0.0772               |
|             | 7F       | 3.7 (3.0-4.6)                  | 0.36 (0.28-0.46)                | 0.1 (0.07-0.13)                                        | <0.0001              | 1 (0.8-1.3)                      | 0.28 (0.2-0.4)                                         | <0.0001              | 2.92 (2.04-4.19)                                         | <0.0001              |
|             | 9V       | 1.5 (1.1-2.0)                  | 0.20 (0.17-0.25)                | 0.14 (0.09-0.2)                                        | <0.0001              | 0.3 (0.22-0.4)                   | 0.2 (0.13-0.3)                                         | <0.0001              | 1.46 (1.02-2.09)                                         | 0.0292               |
|             | 14       | 2.1 (1.5-3.0)                  | 0.58 (0.46-0.74)                | 0.27 (0.17-0.43)                                       | <0.0001              | 0.66 (0.52-0.84)                 | 0.31 (0.2-0.49)                                        | <0.0001              | 1.14 (0.8-1.63)                                          | 0.4520               |
|             | 18C      | 1.3 (1-1.6.0)                  | 0.33 (0.27-0.40)                | 0.25 (0.19-0.35)                                       | <0.0001              | 0.37 (0.3-0.44)                  | 0.28 (0.21-0.39)                                       | <0.0001              | 1.11 (0.85-1.46)                                         | 0.4253               |
|             | 19A      | 2.1 (1.7-2.7)                  | 0.43 (0.36-0.52)                | 0.21 (0.15-0.28)                                       | <0.0001              | 0.45 (0.37-0.55)                 | 0.21 (0.16-0.29)                                       | <0.0001              | 1.03 (0.78-1.36)                                         | 0.8233               |
|             | 19F      | 3.8 (3-4.7.0)                  | 0.82 (0.71-0.94)                | 0.22 (0.16-0.29)                                       | <0.0001              | 1 (0.9-1.3)                      | 0.28 (0.2-0.38)                                        | <0.0001              | 1.27 (1-1.62)                                            | 0.0407               |
|             | 23F      | 0.94 (0.70-1.27)               | 0.09 (0.07-0.10)                | 0.09 (0.06-0.13)                                       | <0.0001              | 0.09 (0.07-0.11)                 | 0.1 (0.07-0.14)                                        | <0.0001              | 1.04 (0.79-1.38)                                         | 0.7615               |
| >=0.35      | 1        | 91; 95.8 (89.7-98.4)           | 70; 75.3 (65.6-82.9)            | -20.52 (-30.36 to -9.86)                               | <0.0001              | 80; 87 (78.6-92.4)               | -8.83 (-17.32 to -0.03)                                | 0.0373               | -11.69 (-23.15 - 0.28)                                   | 0.0596               |
|             | 3        | 80; 84.2 (75.6-90.2)           | 71; 76.3 (66.8-83.8)            | -7.87 (-19.61 - 4.17)                                  | 0.2014               | 83; 90.2 (82.4-94.8)             | 6.01 (-4.27 - 15.98)                                   | 0.2758               | -13.87 (-24.71 to -2.43)                                 | 0.0172               |
|             | 4        | 87; 91.6 (84.3-95.7)           | 33; 35.5 (26.5-45.6)            | -56.1 (-66.71 to -43.16)                               | <0.0001              | 62; 67.4 (57.3-76.1)             | -24.19 (-35.35 to -12.05)                              | <0.0001              | -31.91 (-45.42 to -17.05)                                | <0.0001              |
|             | 5        | 87; 91.6 (84.3-95.7)           | 43; 46.2 (36.5-56.3)            | -45.34 (-56.53 to -32.28)                              | <0.0001              | 57; 62 (51.7-71.2)               | -29.62 (-40.96 to -17.08)                              | <0.0001              | -15.72 (-30.1 to -0.67)                                  | 0.0390               |

|     |                      |                      |                           |         |                      |                           |         |                           |         |
|-----|----------------------|----------------------|---------------------------|---------|----------------------|---------------------------|---------|---------------------------|---------|
| 6A  | 76; 80.0 (70.9-86.8) | 10; 10.8 (5.9-18.7)  | -69.25 (-78.6 to -57)     | <0.0001 | 11; 12 (6.8-20.2)    | -68.04 (-77.62 to -55.61) | <0.0001 | -1.2 (-10.96 - 8.58)      | 0.8209  |
| 6B  | 58; 61.1 (51.0-70.2) | 6; 6.5 (3.0-13.4)    | -54.6 (-65.03 to -41.88)  | <0.0001 | 2; 2.2 (0.6-7.6)     | -58.88 (-68.47 to -46.79) | <0.0001 | 4.28 (-2.47 - 10.82)      | 0.2783  |
| 7F  | 92; 96.8 (91.1-98.9) | 50; 53.8 (43.7-63.5) | -43.08 (-53.49 to -30.9)  | <0.0001 | 76; 82.6 (73.6-89)   | -14.23 (-23.11 to -4.81)  | 0.0013  | -28.85 (-41.53 to -14.93) | <0.0001 |
| 9V  | 81; 85.3 (76.8-91.0) | 24; 25.8 (18.0-35.5) | -59.46 (-70.18 to -46.26) | <0.0001 | 37; 40.2 (30.8-50.4) | -45.05 (-56.95 to -31.27) | <0.0001 | -14.41 (-28.04 to -0.18)  | 0.0427  |
| 14  | 80; 84.2 (75.6-90.2) | 65; 69.9 (59.9-78.3) | -14.32 (-26.44 to -1.62)  | 0.0239  | 68; 73.9 (64.1-81.8) | -10.3 (-22.25 - 2.04)     | 0.1052  | -4.02 (-17.41 - 9.55)     | 0.6243  |
| 18C | 79; 83.2 (74.4-89.4) | 47; 50.5 (40.6-60.5) | -32.62 (-45.13 to -18.76) | <0.0001 | 44; 47.8 (37.9-57.9) | -35.33 (-47.82 to -21.38) | <0.0001 | 2.71 (-12.28 - 17.59)     | 0.7693  |
| 19A | 88; 92.6 (85.6-96.4) | 52; 55.9 (45.8-65.6) | -36.72 (-47.9 to -24.03)  | <0.0001 | 53; 57.6 (47.4-67.2) | -35.02 (-46.25 to -22.36) | <0.0001 | -1.69 (-16.46 - 13.15)    | 0.8823  |
| 19F | 92; 96.8 (91.1-98.9) | 85; 91.4 (83.9-95.6) | -5.44 (-12.78 - 2.08)     | 0.1310  | 85; 92.4 (85.1-96.3) | -4.45 (-11.61 - 2.83)     | 0.2079  | -0.99 (-9.51 - 7.58)      | >0.9999 |
| 23F | 72; 75.8 (66.3-83.3) | 9; 9.7 (5.2-17.4)    | -66.11 (-75.81 to -53.65) | <0.0001 | 9; 9.8 (5.2-17.6)    | -66.01 (-75.74 to -53.5)  | <0.0001 | -0.11 (-9.3 - 9.08)       | >0.9999 |

<sup>a</sup>GMC (96% CI) or number over 0.35µg/ml threshold; percentage over 0.35µg/ml threshold (96% CI)

<sup>b</sup>Comparison between 6wk+1-PCV13 14wk+1-PCV13 and 2+1-PCV13; GMC compared by ratio between 1+1 / 2+1; percentages compared by difference in percentages above specific threshold between 1+1 and 2+1.

<sup>c</sup>Comparison between 14wk+1-PCV13 and 6wk+1-PCV13; GMC compared by ratio between 14wk/6wk; percentages compared by difference in percentages above specific threshold between 14wk and 6wk (14wk-6wk).

Noninferiority criterion: When comparing GMCs, non-inferiority is shown when the lower limit of the 96% CI of the ratio of GMCs is >0.5 for 10 of the 13 serotypes. When comparing percentages, non-inferiority is shown when the lower limit of the 96% CI of the risk difference is >-10% for 10 of the 13 serotypes.

**Supplementary Table S5: Immune responses following the post-primary series of 10-valent pneumococcal conjugate vaccine (PCV10) in children receiving a single dose at six (6w+1-PCV10) or 14 (14w+1-PCV10) weeks of age, and infants receiving two doses at 6 and 14 weeks of age.**

| Measurement | Serotype | 2+1-PCV10<br>n=93 <sup>a</sup> | 6w+1-PCV10<br>n=94 <sup>a</sup> | Compare 6wk+1-<br>PCV10 to 2+1-<br>PCV10 <sup>b</sup> | p-value <sup>b</sup> | 14w+1-PCV10<br>n=91 <sup>a</sup> | Compare 14wk+1-<br>PCV10 to 2+1-<br>PCV10 <sup>b</sup> | p-value <sup>b</sup> | Comparing 14w+1-<br>PCV10 to 6w+1-<br>PCV10 <sup>c</sup> | p-value <sup>c</sup> |
|-------------|----------|--------------------------------|---------------------------------|-------------------------------------------------------|----------------------|----------------------------------|--------------------------------------------------------|----------------------|----------------------------------------------------------|----------------------|
| GMC         | 1        | 2.6 (2.2-3.0)                  | 1.9 (1.5-2.4)                   | 0.73 (0.54-0.98)                                      | 0.0284               | 1.7 (1.4-2.1)                    | 0.68 (0.53-0.89)                                       | 0.0029               | 0.94 (0.67-1.3)                                          | 0.6790               |
|             | 3*       | 0.08 (0.06-0.09)               | 0.13 (0.11-0.15)                | 1.68 (1.3-2.17)                                       | <0.0001              | 0.08 (0.07-0.1)                  | 1.07 (0.81-1.41)                                       | 0.6143               | 0.64 (0.49-0.82)                                         | 0.0003               |
|             | 4        | 2.5 (2.3-1.0)                  | 0.40 (0.30-0.52)                | 0.16 (0.11-0.22)                                      | <0.0001              | 1.1 (0.8-1.4)                    | 0.42 (0.3-0.59)                                        | <0.0001              | 2.69 (1.83-3.95)                                         | <0.0001              |
|             | 5        | 1.6 (1.3-1.9)                  | 0.90 (0.71-1.15)                | 0.57 (0.42-0.77)                                      | 0.0002               | 1 (0.8-1.3)                      | 0.65 (0.48-0.87)                                       | 0.0023               | 1.14 (0.81-1.61)                                         | 0.4172               |
|             | 6A*      | 0.13 (0.11-0.15)               | 0.14 (0.12-0.17)                | 1.11 (0.87-1.42)                                      | 0.3731               | 0.11 (0.1-0.13)                  | 0.86 (0.68-1.08)                                       | 0.1790               | 0.77 (0.61-0.97)                                         | 0.0228               |
|             | 6B       | 1.2 (0.9-1.6)                  | 0.14 (0.12-0.18)                | 0.12 (0.08-0.17)                                      | <0.0001              | 0.09 (0.08-0.11)                 | 0.08 (0.05-0.11)                                       | <0.0001              | 0.64 (0.47-0.86)                                         | 0.0024               |
|             | 7F       | 2.7 (2.2-3.3)                  | 0.48 (0.36-0.63)                | 0.17 (0.12-0.25)                                      | <0.0001              | 0.85 (0.66-1.08)                 | 0.31 (0.22-0.43)                                       | <0.0001              | 1.77 (1.2-2.62)                                          | 0.0029               |
|             | 9V       | 1.7 (1.4-2.2)                  | 0.36 (0.29-0.46)                | 0.21 (0.15-0.3)                                       | <0.0001              | 0.34 (0.27-0.43)                 | 0.2 (0.14-0.28)                                        | <0.0001              | 0.93 (0.66-1.31)                                         | 0.6745               |
|             | 14       | 4.4 (3.3-5.7)                  | 0.79 (0.62-1.00)                | 0.18 (0.13-0.26)                                      | <0.0001              | 0.46 (0.37-0.57)                 | 0.11 (0.07-0.15)                                       | <0.0001              | 0.58 (0.42-0.81)                                         | 0.0009               |
|             | 18C      | 0.87 (0.68-1.10)               | 0.22 (0.18-0.26)                | 0.25 (0.18-0.34)                                      | <0.0001              | 0.31 (0.26-0.38)                 | 0.36 (0.26-0.49)                                       | <0.0001              | 1.43 (1.09-1.88)                                         | 0.0067               |
|             | 19A*     | 0.19 (0.16-0.23)               | 0.33 (0.27-0.40)                | 1.74 (1.32-2.28)                                      | <0.0001              | 0.18 (0.15-0.22)                 | 0.95 (0.73-1.24)                                       | 0.7110               | 0.55 (0.42-0.72)                                         | <0.0001              |
|             | 19F      | 2.0 (1.6-2.5)                  | 0.81 (0.68-0.97)                | 0.4 (0.3-0.53)                                        | <0.0001              | 0.61 (0.5-0.74)                  | 0.3 (0.22-0.41)                                        | <0.0001              | 0.76 (0.58-0.99)                                         | 0.0341               |
|             | 23F      | 0.94 (0.74-1.19)               | 0.11 (0.09-0.13)                | 0.12 (0.08-0.16)                                      | <0.0001              | 0.09 (0.07-0.11)                 | 0.1 (0.07-0.13)                                        | <0.0001              | 0.83 (0.61-1.12)                                         | 0.1976               |
| >=0.35      | 1        | 93; 100 (96.0-100)             | 86; 91.5 (84.1-95.6)            | -8.51 (-14.8 to -1.85)                                | 0.0067               | 83; 91.2 (83.6-95.5)             | -8.79 (-15.28 to -1.97)                                | 0.0030               | 0.28 (-8.47 - 9.08)                                      | >0.9999              |
|             | 3*       | 4; 4.3 (1.7-10.5)              | 9; 9.6 (5.1-17.2)               | 5.27 (-2.79 - 13.1)                                   | 0.2496               | 5; 5.5 (2.4-12.2)                | 1.19 (-5.85 - 8.22)                                    | 0.7457               | 4.08 (-4.3 - 12.23)                                      | 0.4062               |
|             | 4        | 90; 96.8 (90.9-98.9)           | 49; 52.1 (42.1-61.9)            | -44.65 (-55 to -32.41)                                | <0.0001              | 76; 83.5 (74.6-89.7)             | -13.26 (-22.08 to -3.91)                               | 0.0026               | -31.39 (-43.91 to -17.51)                                | <0.0001              |
|             | 5        | 88; 94.6 (88.0-97.7)           | 71; 75.5 (66.0-83.1)            | -19.09 (-29.11 to -8.26)                              | 0.0003               | 78; 85.7 (77.1-91.5)             | -8.91 (-17.92 - 0.44)                                  | 0.0492               | -10.18 (-21.79 - 1.9)                                    | 0.0957               |

|      |                      |                      |                           |         |                      |                           |         |                          |        |
|------|----------------------|----------------------|---------------------------|---------|----------------------|---------------------------|---------|--------------------------|--------|
| 6A*  | 13; 14.0 (8.4-22.5)  | 14; 14.9 (9.1-23.5)  | 0.92 (-9.78 - 11.55)      | >0.9999 | 10; 11 (6.1-19.1)    | -2.99 (-13.06 - 7.24)     | 0.6570  | 3.9 (-6.46 - 14.05)      | 0.5138 |
| 6B   | 71; 76.3 (66.8-83.8) | 18; 19.1 (12.5-28.3) | -57.2 (-68.29 to -43.7)   | <0.0001 | 11; 12.1 (6.9-20.4)  | -64.26 (-74.39 to -51.38) | <0.0001 | 7.06 (-4.1 - 17.88)      | 0.2267 |
| 7F   | 90; 96.8 (90.9-98.9) | 61; 64.9 (54.8-73.8) | -31.88 (-42.09 to -20.32) | <0.0001 | 71; 78 (68.5-85.3)   | -18.75 (-28.23 to -8.51)  | <0.0001 | -13.13 (-26.24 - 0.57)   | 0.0527 |
| 9V   | 88; 94.6 (88.0-97.7) | 41; 43.6 (34.0-53.7) | -51.01 (-61.53 to -38.34) | <0.0001 | 46; 50.5 (40.5-60.6) | -44.07 (-54.96 to -31.33) | <0.0001 | -6.93 (-21.67 - 8.1)     | 0.3786 |
| 14   | 89; 95.7 (89.5-98.3) | 69; 73.4 (63.7-81.3) | -22.29 (-32.26 to -11.38) | <0.0001 | 59; 64.8 (54.6-73.9) | -30.86 (-41.44 to -19)    | <0.0001 | 8.57 (-5.41 - 22.21)     | 0.2649 |
| 18C  | 76; 81.7 (72.7-88.3) | 24; 25.5 (17.8-35.2) | -56.19 (-67.37 to -42.65) | <0.0001 | 41; 45.1 (35.2-55.3) | -36.67 (-49.33 to -22.46) | <0.0001 | -19.52 (-33.15 to -5.09) | 0.0059 |
| 19A* | 22; 23.7 (16.2-33.2) | 42; 44.7 (35.0-54.7) | 21.02 (6.79 - 34.37)      | 0.0033  | 20; 22 (14.7-31.5)   | -1.68 (-14.31 - 11.05)    | 0.8612  | 22.7 (8.5 - 35.92)       | 0.0011 |
| 19F  | 91; 97.8 (92.5-99.4) | 84; 89.4 (81.5-94.1) | -8.49 (-15.93 to -0.67)   | 0.0327  | 69; 75.8 (66.1-83.5) | -22.03 (-31.47 to -11.67) | <0.0001 | 13.54 (1.92 - 24.63)     | 0.0192 |
| 23F  | 71; 76.3 (66.8-83.8) | 13; 13.8 (8.3-22.2)  | -62.51 (-72.88 to -49.54) | <0.0001 | 9; 9.9 (5.3-17.7)    | -66.45 (-76.22 to -53.86) | <0.0001 | 3.94 (-6.08 - 13.74)     | 0.4978 |

<sup>a</sup>GMC (96% CI) or number over 0.35µg/ml threshold; percentage over 0.35µg/ml threshold (96% CI)

<sup>b</sup>Comparison between 6wk+1-PCV10 or 14wk+1-PCV10 and 2+1-PCV10; GMC compared by ratio between 1+1 / 2+1; percentages compared by difference in percentages above specific threshold between 1+1 and 2+1.

<sup>c</sup>Comparison between 14wk+1-PCV10 and 6wk+1-PCV10; GMC compared by ratio between 14wk/6wk; percentages compared by difference in percentages above specific threshold between 14wk and 6wk (14wk-6wk).

Noninferiority criterion: When comparing GMCs, non-inferiority is shown when the lower limit of the 96% CI of the ratio of GMCs is >0.5 for 8 of the 10 vaccine serotypes. When comparing percentages, non-inferiority is shown when the lower limit of the 96% CI of the risk difference is >-10% for 8 of the 10 vaccine serotypes.

\*Serotypes not included in PCV10 formulation

**Supplementary Table S6: Immune responses prior to the booster dose of 13-valent pneumococcal conjugate vaccine (PCV13) in children receiving a single dose at six (6w+1-PCV-13) or 14 (14w+1-PCV13) weeks of age, and infants receiving two doses at 6 and 14 weeks of age (2+1-PCV13).**

| Measurement | Serotype | 2+1-PCV13<br>n=76 <sup>a</sup> | 6w+1-PCV13<br>n=73 <sup>a</sup> | Compare 6wk+1-<br>PCV13 to 2+1-<br>PCV13 <sup>b</sup> | p-value <sup>b</sup> | 14w+1-PCV13<br>n=69 <sup>a</sup> | Compare 14wk+1-<br>PCV13 to 2+1-<br>PCV13 <sup>b</sup> | p-value <sup>b</sup> | Comparing 14w+1-<br>PCV13 to 6w+1-<br>PCV13 <sup>c</sup> | p-value <sup>c</sup> |
|-------------|----------|--------------------------------|---------------------------------|-------------------------------------------------------|----------------------|----------------------------------|--------------------------------------------------------|----------------------|----------------------------------------------------------|----------------------|
| GMC         | 1        | 1.2 (1.0-1.5)                  | 0.46 (0.35-0.61)                | 0.38 (0.27-0.54)                                      | <0.0001              | 0.85 (0.71-1.01)                 | 0.7 (0.53-0.93)                                        | 0.0107               | 1.84 (1.31-2.6)                                          | 0.0003               |
|             | 3        | 0.21 (0.17-0.27)               | 0.16 (0.13-0.21)                | 0.77 (0.54-1.11)                                      | 0.1364               | 0.24 (0.2-0.3)                   | 1.16 (0.83-1.61)                                       | 0.3597               | 1.5 (1.07-2.11)                                          | 0.0136               |
|             | 4        | 0.38 (0.30-0.47)               | 0.07 (0.06-0.09)                | 0.18 (0.13-0.25)                                      | <0.0001              | 0.31 (0.24-0.39)                 | 0.81 (0.57-1.15)                                       | 0.2144               | 4.44 (3.17-6.23)                                         | <0.0001              |
|             | 5        | 0.49 (0.40-0.61)               | 0.14 (0.11-0.18)                | 0.29 (0.21-0.4)                                       | <0.0001              | 0.45 (0.35-0.57)                 | 0.92 (0.66-1.28)                                       | 0.6026               | 3.17 (2.25-4.46)                                         | <0.0001              |
|             | 6A       | 0.66 (0.52-0.84)               | 0.16 (0.14-0.19)                | 0.25 (0.18-0.33)                                      | <0.0001              | 0.3 (0.24-0.39)                  | 0.46 (0.32-0.66)                                       | <0.0001              | 1.86 (1.38-2.51)                                         | <0.0001              |
|             | 6B       | 0.30 (0.24-0.38)               | 0.10 (0.08-0.11)                | 0.32 (0.24-0.44)                                      | <0.0001              | 0.14 (0.11-0.17)                 | 0.46 (0.33-0.63)                                       | <0.0001              | 1.41 (1.09-1.82)                                         | 0.0061               |
|             | 7F       | 1.1 (0.9-1.4)                  | 0.29 (0.23-0.36)                | 0.25 (0.18-0.35)                                      | <0.0001              | 1.1 (0.9-1.4)                    | 1.01 (0.74-1.38)                                       | 0.9364               | 3.97 (2.85-5.52)                                         | <0.0001              |
|             | 9V       | 0.57 (0.44-0.72)               | 0.12 (0.10-0.14)                | 0.21 (0.15-0.29)                                      | <0.0001              | 0.37 (0.3-0.47)                  | 0.66 (0.47-0.94)                                       | 0.0146               | 3.18 (2.34-4.33)                                         | <0.0001              |
|             | 14       | 1.7 (1.2-2.4)                  | 0.32 (0.25-0.42)                | 0.19 (0.12-0.3)                                       | <0.0001              | 0.85 (0.62-1.17)                 | 0.5 (0.31-0.82)                                        | 0.0041               | 2.63 (1.71-4.04)                                         | <0.0001              |
|             | 18C      | 0.36 (0.30-0.44)               | 0.14 (0.10-0.18)                | 0.37 (0.26-0.53)                                      | <0.0001              | 0.26 (0.21-0.33)                 | 0.73 (0.54-0.99)                                       | 0.0327               | 1.96 (1.36-2.81)                                         | 0.0002               |
|             | 19A      | 0.45 (0.35-0.56)               | 0.27 (0.02-0.36)                | 0.6 (0.41-0.88)                                       | 0.0067               | 0.3 (0.23-0.38)                  | 0.66 (0.46-0.95)                                       | 0.0196               | 1.11 (0.74-1.66)                                         | 0.5962               |
|             | 19F      | 1.0 (0.8-1.3)                  | 0.57 (0.43-0.75)                | 0.55 (0.38-0.8)                                       | 0.0011               | 0.66 (0.55-0.79)                 | 0.65 (0.48-0.88)                                       | 0.0034               | 1.16 (0.83-1.64)                                         | 0.3610               |
|             | 23F      | 0.21 (0.16-0.28)               | 0.07 (0.05-0.08)                | 0.31 (0.22-0.44)                                      | <0.0001              | 0.1 (0.08-0.12)                  | 0.45 (0.32-0.63)                                       | <0.0001              | 1.45 (1.09-1.93)                                         | 0.0083               |
| >=0.35      | 1        | 73; 96.1 (89.0-98.6)           | 43; 58.9 (47.4-69.5)            | -37.15 (-48.96 to -23.45)                             | <0.0001              | 61; 88.4 (78.8-94)               | -7.65 (-17.14 - 2.05)                                  | 0.1169               | -29.5 (-42.87 to -14.44)                                 | 0.0001               |
|             | 3        | 18; 23.7 (15.5-34.4)           | 9; 12.3 (6.6-21.8)              | -11.36 (-23.86 - 1.8)                                 | 0.0897               | 24; 34.8 (24.6-46.6)             | 11.1 (-4.48 - 26.19)                                   | 0.1483               | -22.45 (-36.04 to -7.72)                                 | 0.0025               |
|             | 4        | 42; 55.3 (44.1-65.9)           | 3; 4.1 (1.4-11.4)               | -51.15 (-62.53 to -37.06)                             | <0.0001              | 30; 43.5 (32.4-55.2)             | -11.78 (-28.2 - 5.26)                                  | 0.1846               | -39.37 (-51.54 to -25.12)                                | <0.0001              |
|             | 5        | 48; 63.2 (51.9-73.1)           | 13; 17.8 (10.7-28.1)            | -45.35 (-58.7 to -29.6)                               | <0.0001              | 44; 63.8 (52-74.1)               | 0.61 (-15.69 - 16.81)                                  | >0.9999              | -45.96 (-59.66 to -29.77)                                | <0.0001              |

|     |                      |                      |                           |         |                      |                           |         |                           |         |
|-----|----------------------|----------------------|---------------------------|---------|----------------------|---------------------------|---------|---------------------------|---------|
| 6A  | 54; 71.1 (60.0-80.0) | 8; 11.0 (5.7-20.2)   | -60.09 (-71.62 to -45.4)  | <0.0001 | 30; 43.5 (32.4-55.2) | -27.57 (-42.93 to -10.77) | 0.0013  | -32.52 (-46 to -17.33)    | <0.0001 |
| 6B  | 37; 48.7 (37.8-59.7) | 2; 2.7 (0.8-9.5)     | -45.94 (-57.24 to -32.2)  | <0.0001 | 8; 11.6 (6-21.2)     | -37.09 (-50.21 to -21.87) | <0.0001 | -8.85 (-18.02 - 0.67)     | 0.0508  |
| 7F  | 68; 89.5 (80.6-94.6) | 28; 38.4 (28.1-49.8) | -51.12 (-63.53 to -36.06) | <0.0001 | 62; 89.9 (80.5-95)   | 0.38 (-10.43 - 10.98)     | >0.9999 | -51.5 (-63.95 to -36.18)  | <0.0001 |
| 9V  | 55; 72.4 (61.4-81.2) | 6; 8.2 (3.8-16.8)    | -64.15 (-75 to -49.93)    | <0.0001 | 39; 56.5 (44.8-67.6) | -15.85 (-31.45 - 0.53)    | 0.0560  | -48.3 (-60.92 to -33.09)  | <0.0001 |
| 14  | 60; 78.9 (68.5-86.6) | 29; 39.7 (29.3-51.2) | -39.22 (-53.28 to -23.13) | <0.0001 | 50; 72.5 (61-81.6)   | -6.48 (-20.95 - 8.2)      | 0.4381  | -32.74 (-47.81 to -15.86) | 0.0001  |
| 18C | 37; 48.7 (37.8-59.7) | 12; 16.4 (9.7-26.6)  | -32.25 (-46.07 to -16.7)  | <0.0001 | 27; 39.1 (28.5-50.9) | -9.55 (-25.92 - 7.36)     | 0.3151  | -22.69 (-37.02 to -7.19)  | 0.0028  |
| 19A | 43; 56.6 (45.4-67.1) | 22; 30.1 (20.8-41.4) | -26.44 (-41.64 to -9.85)  | 0.0016  | 30; 43.5 (32.4-55.2) | -13.1 (-29.45 - 3.96)     | 0.1357  | -13.34 (-29.3 - 3.31)     | 0.1180  |
| 19F | 67; 88.2 (79.0-93.6) | 45; 61.6 (50.2-71.9) | -26.51 (-39.77 to -11.92) | 0.0003  | 56; 81.2 (70.4-88.6) | -7 (-19.33 - 5.53)        | 0.2568  | -19.52 (-34.03 to -3.87)  | 0.0155  |
| 23F | 23; 30.3 (21.1-41.3) | 2; 2.7 (0.8-9.5)     | -27.52 (-38.46 to -15.07) | <0.0001 | 5; 7.2 (3.1-15.9)    | -23.02 (-35.01 to -9.62)  | 0.0006  | -4.51 (-12.67 - 3.77)     | 0.2653  |

<sup>a</sup>GMC (96% CI) or number over 0.35µg/ml threshold; percentage over 0.35µg/ml threshold (96% CI)

<sup>b</sup>Comparison between 6wk+1[PCV13 or 14wk+1-PCV13 and 2+1-PCV13; GMC compared by ratio between 1+1 / 2+1; percentages compared by difference in percentages above specific threshold between 1+1 and 2+1.

<sup>c</sup>Comparison between 14wk+1-PCV13 and 6wk+1-PCV13; GMC compared by ratio between 14wk/6wk; percentages compared by difference in percentages above specific threshold between 14wk and 6wk (14wk-6wk).

Noninferiority criterion: When comparing GMCs, non-inferiority is shown when the lower limit of the 96% CI of the ratio of GMCs is >0.5 for 10 of the 13 serotypes. When comparing percentages, non-inferiority is shown when the lower limit of the 96% CI of the risk difference is >-10% for 10 of the 13 serotypes.

<sup>e</sup>number over 0.35µg/ml threshold; percentage over 0.35µg/ml threshold (95% CI)



**Supplementary Table S7: Immune responses prior to the booster dose of 10-valent pneumococcal conjugate vaccine (PCV10) in children receiving a single dose at six (6w+1-PCV10) or 14 (14w+1-PCV10) weeks of age, and infants receiving two doses at 6 and 14 weeks of age (2+1-PCV10).**

| Measurement | Serotype | 2+1-PCV10 <sup>a</sup><br>n=73 | 6w+1-PCV10 <sup>a</sup><br>n=76 | Compare 6wk+1-<br>PCV10 to 2+1-<br>PCV10 <sup>b</sup> | p-value <sup>b</sup> | 14w+1-PCV10 <sup>a</sup><br>n=69 | Compare 14wk+1-<br>PCV10 to 2+1-<br>PCV13 <sup>b</sup> | p-value <sup>b</sup> | Comparing 14w+1-<br>PCV10 to 6w+1-<br>PCV10 <sup>c</sup> | p-value <sup>c</sup> |
|-------------|----------|--------------------------------|---------------------------------|-------------------------------------------------------|----------------------|----------------------------------|--------------------------------------------------------|----------------------|----------------------------------------------------------|----------------------|
| GMC         | 1        | 0.92 (0.75-1.11)               | 0.67 (0.53-0.85)                | 0.73 (0.53-1.01)                                      | 0.0480               | 0.95 (0.75-1.2)                  | 1.04 (0.75-1.42)                                       | 0.8143               | 1.42 (0.99-2.01)                                         | 0.0432               |
|             | 3*       | 0.07 (0.05-0.09)               | 0.08 (0.07-0.11)                | 1.25 (0.86-1.81)                                      | 0.2198               | 0.1 (0.07-0.12)                  | 1.43 (0.98-2.1)                                        | 0.0537               | 1.15 (0.8-1.65)                                          | 0.4290               |
|             | 4        | 0.73 (0.59-0.91)               | 0.24 (0.19-0.31)                | 0.33 (0.24-0.46)                                      | <0.0001              | 0.65 (0.51-0.84)                 | 0.89 (0.64-1.25)                                       | 0.4854               | 2.69 (1.89-3.84)                                         | <0.0001              |
|             | 5        | 0.40 (0.32-0.50)               | 0.23 (0.18-0.30)                | 0.58 (0.4-0.83)                                       | 0.0018               | 0.34 (0.27-0.42)                 | 0.84 (0.61-1.17)                                       | 0.2813               | 1.46 (1.02-2.09)                                         | 0.0301               |
|             | 6A*      | 0.21 (0.16-0.26)               | 0.16 (0.14-0.18)                | 0.75 (0.57-1)                                         | 0.0372               | 0.2 (0.16-0.25)                  | 0.97 (0.7-1.34)                                        | 0.8267               | 1.29 (1-1.66)                                            | 0.0438               |
|             | 6B       | 1.2 (1.0-1.6)                  | 0.43 (0.34-0.54)                | 0.34 (0.24-0.48)                                      | <0.0001              | 0.78 (0.63-0.96)                 | 0.62 (0.45-0.86)                                       | 0.0032               | 1.82 (1.3-2.55)                                          | 0.0003               |
|             | 7F       | 0.93 (0.73-1.20)               | 0.51 (0.39-0.66)                | 0.54 (0.37-0.79)                                      | 0.0010               | 1 (0.8-1.3)                      | 1.12 (0.79-1.59)                                       | 0.5068               | 2.07 (1.44-2.96)                                         | <0.0001              |
|             | 9V       | 0.72 (0.59-0.87)               | 0.35 (0.28-0.43)                | 0.48 (0.35-0.65)                                      | <0.0001              | 0.57 (0.45-0.71)                 | 0.79 (0.58-1.07)                                       | 0.1138               | 1.63 (1.18-2.27)                                         | 0.0022               |
|             | 14       | 1.5 (1.1-2.1)                  | 0.39 (0.30-0.51)                | 0.26 (0.17-0.41)                                      | <0.0001              | 1.1 (0.8-1.4)                    | 0.71 (0.45-1.13)                                       | 0.1330               | 2.69 (1.76-4.11)                                         | <0.0001              |
|             | 18C      | 0.41 (0.32-0.53)               | 0.11 (0.09-0.14)                | 0.27 (0.18-0.38)                                      | <0.0001              | 0.24 (0.18-0.3)                  | 0.57 (0.39-0.83)                                       | 0.0024               | 2.16 (1.49-3.13)                                         | <0.0001              |
|             | 19A*     | 0.13 (0.11-0.16)               | 0.13 (0.11-0.16)                | 1 (0.76-1.31)                                         | 0.9755               | 0.15 (0.12-0.18)                 | 1.11 (0.84-1.47)                                       | 0.4488               | 1.11 (0.85-1.45)                                         | 0.4058               |
|             | 19F      | 1.2 (0.9-1.6)                  | 0.52 (0.39-0.68)                | 0.42 (0.28-0.63)                                      | <0.0001              | 0.75 (0.58-0.98)                 | 0.61 (0.41-0.9)                                        | 0.0102               | 1.45 (0.97-2.17)                                         | 0.0545               |
|             | 23F      | 0.46 (0.36-0.59)               | 0.14 (0.11-0.17)                | 0.3 (0.21-0.43)                                       | <0.0001              | 0.27 (0.22-0.34)                 | 0.59 (0.41-0.84)                                       | 0.0021               | 1.95 (1.41-2.69)                                         | <0.0001              |
| ≥0.35       | 1        | 64; 87.7 (78.2-93.4)           | 55; 72.4 (61.4-81.2)            | -15.3 (-28.08 to -1.66)                               | 0.0246               | 59; 85.5 (75.3-91.9)             | -2.16 (-14.11 - 9.79)                                  | 0.8070               | -13.14 (-26.4 - 0.97)                                    | 0.0683               |
|             | 3*       | 6; 8.2 (3.8-16.8)              | 4; 5.3 (2.1-12.8)               | -2.96 (-11.87 - 6.02)                                 | 0.5278               | 6; 8.7 (4-17.7)                  | 0.48 (-9.49 - 10.55)                                   | >0.9999              | -3.43 (-12.68 - 5.78)                                    | 0.5188               |
|             | 4        | 60; 82.2 (71.9-89.3)           | 22; 28.9 (20.0-40.0)            | -53.24 (-65.91 to -37.78)                             | <0.0001              | 50; 72.5 (61-81.6)               | -9.73 (-23.84 - 4.84)                                  | 0.2278               | -43.52 (-57.6 to -27.09)                                 | <0.0001              |
|             | 5        | 42; 57.5 (46.1-68.2)           | 28; 36.8 (26.9-48.1)            | -20.69 (-36.4 to -3.91)                               | 0.0140               | 33; 47.8 (36.5-59.4)             | -9.71 (-26.35 - 7.46)                                  | 0.3131               | -10.98 (-27.28 - 5.86)                                   | 0.2383               |

|      |                      |                      |                           |         |                      |                          |        |                           |         |
|------|----------------------|----------------------|---------------------------|---------|----------------------|--------------------------|--------|---------------------------|---------|
| 6A*  | 15; 20.5 (12.9-31.2) | 8; 10.5 (5.4-19.4)   | -10.02 (-22.02 - 2.44)    | 0.1137  | 17; 24.6 (16-36)     | 4.09 (-10.36 - 18.4)     | 0.6883 | -14.11 (-26.76 to -0.87)  | 0.0289  |
| 6B   | 66; 90.4 (81.5-95.3) | 47; 61.8 (50.6-71.9) | -28.57 (-41.27 to -14.32) | <0.0001 | 60; 87 (77-93)       | -3.45 (-14.62 - 7.78)    | 0.6002 | -25.11 (-38.51 to -10.24) | 0.0006  |
| 7F   | 62; 84.9 (75.0-91.4) | 51; 67.1 (55.9-76.6) | -17.83 (-31.32 to -3.34)  | 0.0130  | 61; 88.4 (78.8-94)   | 3.47 (-8.56 - 15.21)     | 0.6260 | -21.3 (-34.29 to -7.02)   | 0.0027  |
| 9V   | 62; 84.9 (75.0-91.4) | 38; 50.0 (39.0-61.0) | -34.93 (-48.52 to -19.48) | <0.0001 | 53; 76.8 (65.6-85.2) | -8.12 (-21.5 - 5.61)     | 0.2853 | -26.81 (-41.66 to -10.46) | 0.0011  |
| 14   | 60; 82.2 (71.9-89.3) | 37; 48.7 (37.8-59.7) | -33.51 (-47.46 to -17.77) | <0.0001 | 58; 84.1 (73.7-90.9) | 1.87 (-11.23 - 14.76)    | 0.8252 | -35.37 (-49.16 to -19.6)  | <0.0001 |
| 18C  | 46; 63.0 (51.5-73.2) | 10; 13.2 (7.3-22.6)  | -49.86 (-62.6 to -34.53)  | <0.0001 | 22; 31.9 (22.1-43.6) | -31.13 (-46.45 to -14.1) | 0.0002 | -18.73 (-32.28 to -4.31)  | 0.0088  |
| 19A* | 7; 9.6 (4.7-18.5)    | 10; 13.2 (7.3-22.6)  | 3.57 (-7.48 - 14.35)      | 0.6089  | 12; 17.4 (10.2-28)   | 7.8 (-4.29 - 19.58)      | 0.2198 | -4.23 (-16.63 - 8.22)     | 0.4970  |
| 19F  | 65; 89.0 (79.8-94.3) | 46; 60.5 (49.3-70.8) | -28.51 (-41.49 to -14)    | <0.0001 | 53; 76.8 (65.6-85.2) | -12.23 (-24.89 - 1)      | 0.0724 | -16.29 (-31.22 to -0.38)  | 0.0490  |
| 23F  | 47; 64.4 (52.9-74.4) | 13; 17.1 (10.3-27.1) | -47.28 (-60.52 to -31.59) | <0.0001 | 27; 39.1 (28.5-50.9) | -25.25 (-41.04 to -8.09) | 0.0041 | -22.03 (-36.37 to -6.6)   | 0.0049  |

<sup>a</sup>GMC (96% CI) or number over 0.35µg/ml threshold; percentage over 0.35µg/ml threshold (96% CI)

<sup>b</sup>Comparison between 6wk+1-PCV10 or 14wk+1-PCV10 and 2+1-PCV10; GMC compared by ratio between 1+1 / 2+1; percentages compared by difference in percentages above specific threshold between 1+1 and 2+1.

<sup>c</sup>Comparison between 14wk+1-PCV10 and 6wk+1-PCV10; GMC compared by ratio between 14wk/6wk; percentages compared by difference in percentages above specific threshold between 14wk and 6wk (14wk-6wk).

Noninferiority criterion: When comparing GMCs, non-inferiority is shown when the lower limit of the 96% CI of the ratio of GMCs is >0.5 for 8 of the 10 vaccine serotypes. When comparing percentages, non-inferiority is shown when the lower limit of the 96% CI of the risk difference is >-10% for 8 of the 10 vaccine serotypes.

\*Serotypes not included in PCV10 formulation

**Supplementary Table S8: Line listing of serious adverse events**

|                                                         | <b>6w+1-PCV10</b> | <b>6w+1-PCV13</b> | <b>14w+1-PCV10</b> | <b>14w+1-PCV13</b> | <b>2+1-PCV10</b> | <b>2+1-PCV13</b> | <b>Total</b> |
|---------------------------------------------------------|-------------------|-------------------|--------------------|--------------------|------------------|------------------|--------------|
| Acute gastro-enteritis                                  | 0                 | 2                 | 1                  | 2                  | 1                | 2                | 8            |
| Adverse event following hexaxim immunization (vomiting) | 0                 | 0                 | 0                  | 0                  | 0                | 1                | 1            |
| Adverse event following varicella immunization (rash)   | 0                 | 0                 | 0                  | 0                  | 1                | 0                | 1            |
| Anaphylactic reaction to Penicillin                     | 0                 | 0                 | 0                  | 0                  | 1                | 0                | 1            |
| Bronchiolitis                                           | 4                 | 6                 | 4                  | 2                  | 5                | 4                | 25           |
| Dysentery                                               | 0                 | 0                 | 0                  | 0                  | 1                | 0                | 1            |
| Febrile seizures                                        | 1                 | 0                 | 1                  | 0                  | 2                | 0                | 4            |
| Fever of unknown origin                                 | 0                 | 1                 | 0                  | 0                  | 0                | 0                | 1            |
| Herpetic gingivostomatitis                              | 1                 | 0                 | 0                  | 0                  | 0                | 0                | 1            |
| Laryngotracheobronchitis and Subglottic Stenosis        | 1                 | 0                 | 0                  | 0                  | 0                | 0                | 1            |
| Lymphadenitis submandibular                             | 0                 | 0                 | 0                  | 0                  | 0                | 1                | 1            |
| Pancytopenia                                            | 1                 | 0                 | 0                  | 0                  | 0                | 0                | 1            |
| Pneumonia                                               | 3                 | 4                 | 2                  | 4                  | 4                | 4                | 21           |
| Pulmonary tuberculosis                                  | 1                 | 0                 | 1                  | 2                  | 0                | 3                | 7            |
| Reaction to vaccine                                     | 0                 | 0                 | 0                  | 0                  | 1                | 0                | 1            |
| Right clavicle fracture                                 | 0                 | 0                 | 0                  | 1                  | 0                | 0                | 1            |
| Scabies                                                 | 0                 | 0                 | 1                  | 0                  | 0                | 0                | 1            |
| Staphylococcal sepsis                                   | 0                 | 0                 | 0                  | 0                  | 0                | 1                | 1            |
| Suspected opioid ingestion                              | 1                 | 0                 | 0                  | 0                  | 0                | 0                | 1            |
| Suspected septic arthritis                              | 0                 | 0                 | 1                  | 0                  | 0                | 0                | 1            |
| Tonsillitis                                             | 0                 | 0                 | 0                  | 0                  | 1                | 0                | 1            |
| Upper respiratory tract infection                       | 0                 | 0                 | 0                  | 0                  | 0                | 1                | 1            |
| Urinary tract infection                                 | 0                 | 0                 | 0                  | 0                  | 0                | 1                | 1            |
| Viral Pneumonia                                         | 1                 | 0                 | 0                  | 0                  | 0                | 0                | 1            |
| <b>Total</b>                                            | <b>14</b>         | <b>13</b>         | <b>11</b>          | <b>11</b>          | <b>17</b>        | <b>18</b>        | <b>84</b>    |

**Supplementary Figure 1: Study schedule of vaccination and evaluation of immune responses in infants vaccinated with either one or two doses of a primary series, followed by a booster dose, of 10-valent (PCV10) or 13-valent (PCV13) pneumococcal conjugate vaccine.**

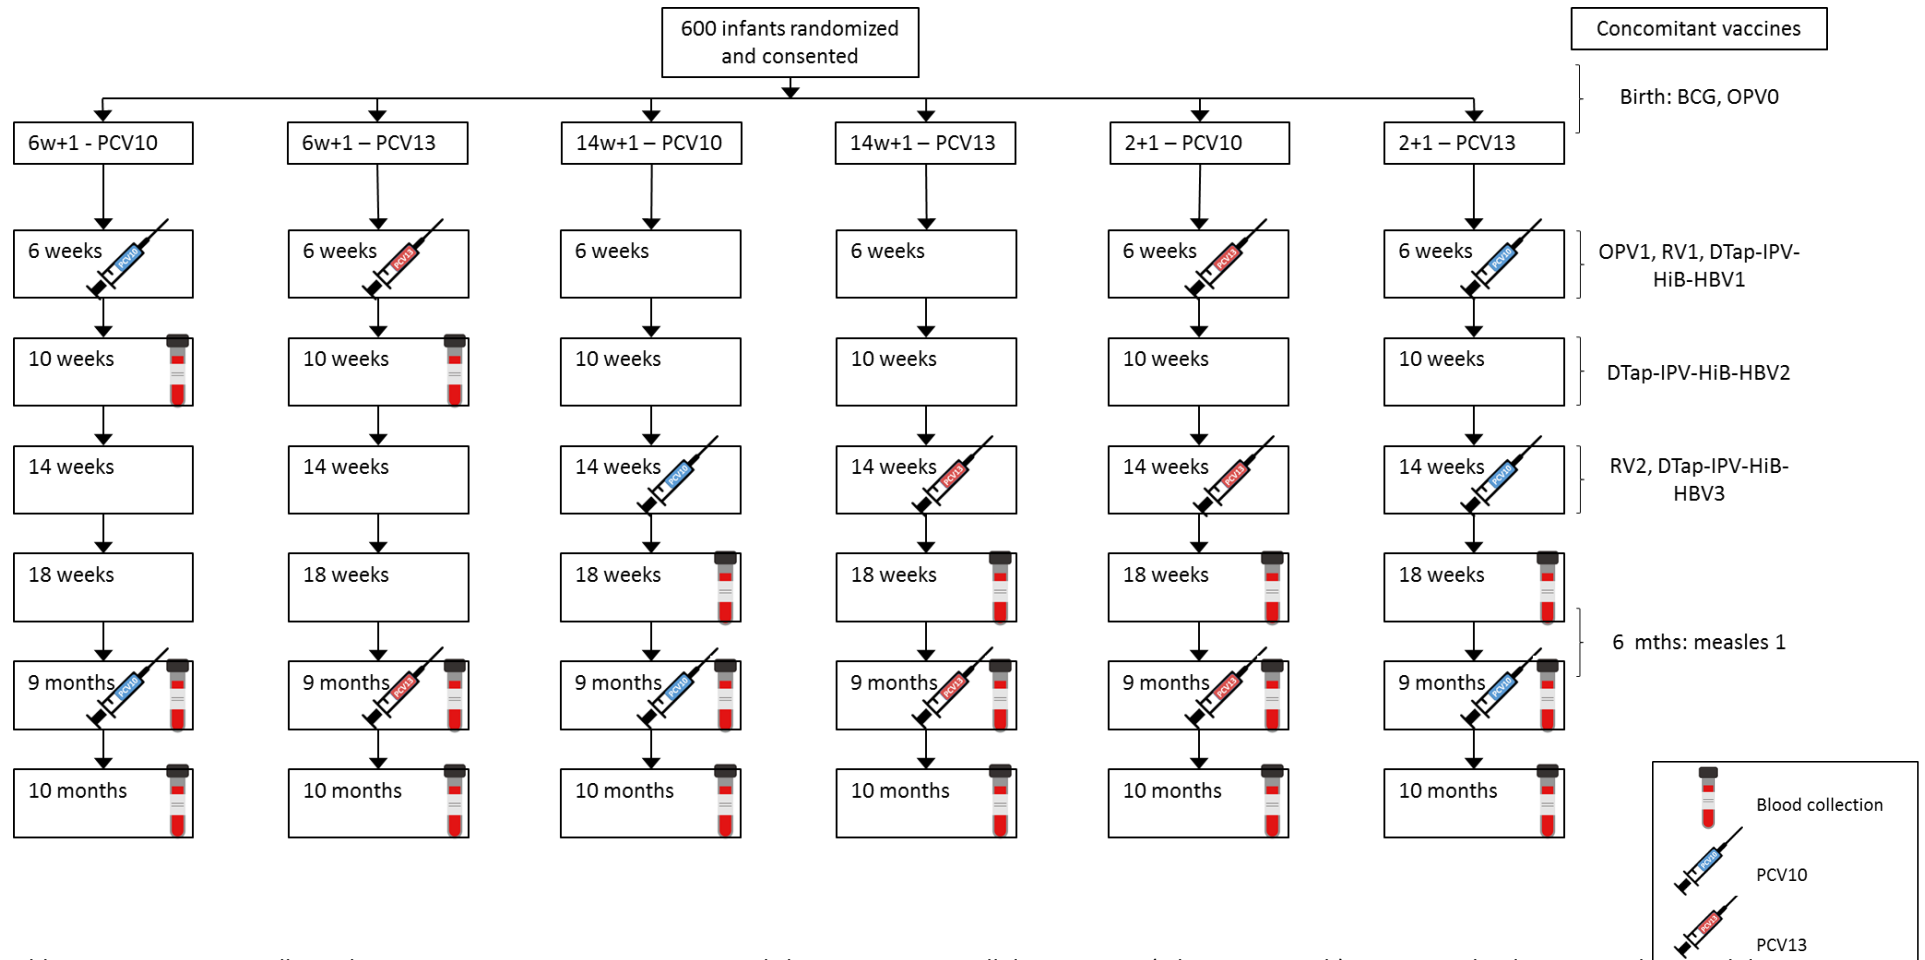

Abbreviations: BCG, Bacillus Calmette Guerin; DTap-IPV-HiB-HBV, Diphtheria, tetanus, acellular pertussis (whooping cough), inactivated polio vaccine, haemophilus influenzae type B, Hepatitis B virus; OPV, (Trivalent) Oral polio vaccine; RV, Rotavirus vaccine.

**Supplementary Figure 2: Serotype-specific serum opsonophagocytic activity (OPA) geometric mean titers (GMT) one-month following a booster dose of 13-valent (PCV13; Figure 3a) or 10-valent (PCV10; Figure 3b) pneumococcal conjugate vaccine (PCV) in infants previously vaccinated with either a single dose at 6 (6w+1-PCV10/13) or 14 weeks (14w+1-PCV10/13) age or two dose at 6 and 14 weeks of age (2+1-PCV10/13) primary series.**

**Supplementary Figure 2a: PCV 13**

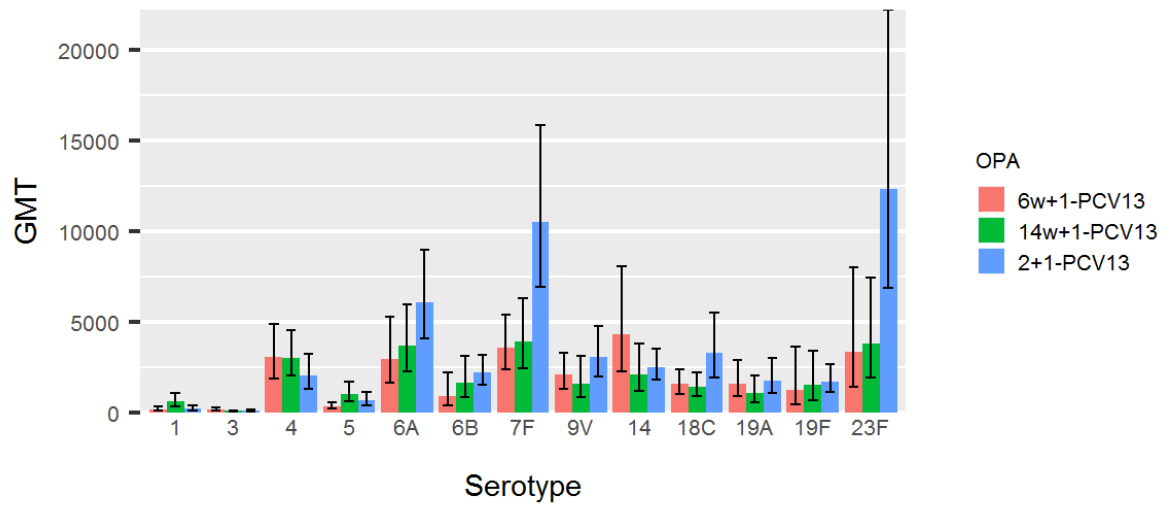

**Supplementary Figure 2b: PCV10**

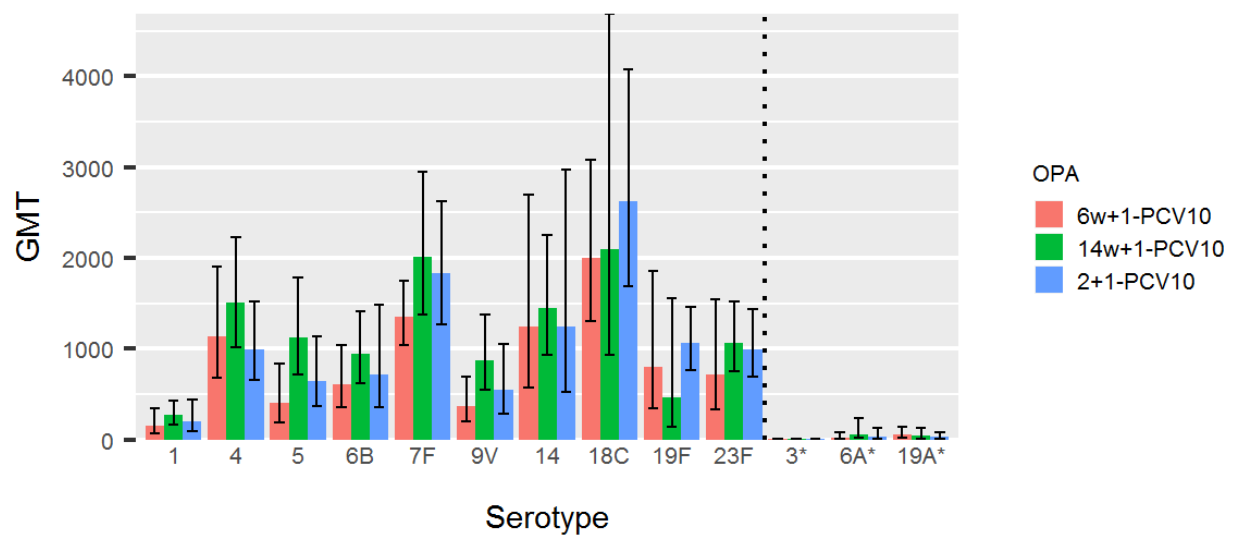

**Supplementary Figure 3: Percentage with opsonophagocytic activity  $\geq$  lower-limit-of-quantification one month post-booster dose of 13-valent (panel a) or 10-valent (panel b) pneumococcal conjugate vaccine (PCV) following a single or two dose primary-series.**

**Supplementary Figure 3a: PCV 13**

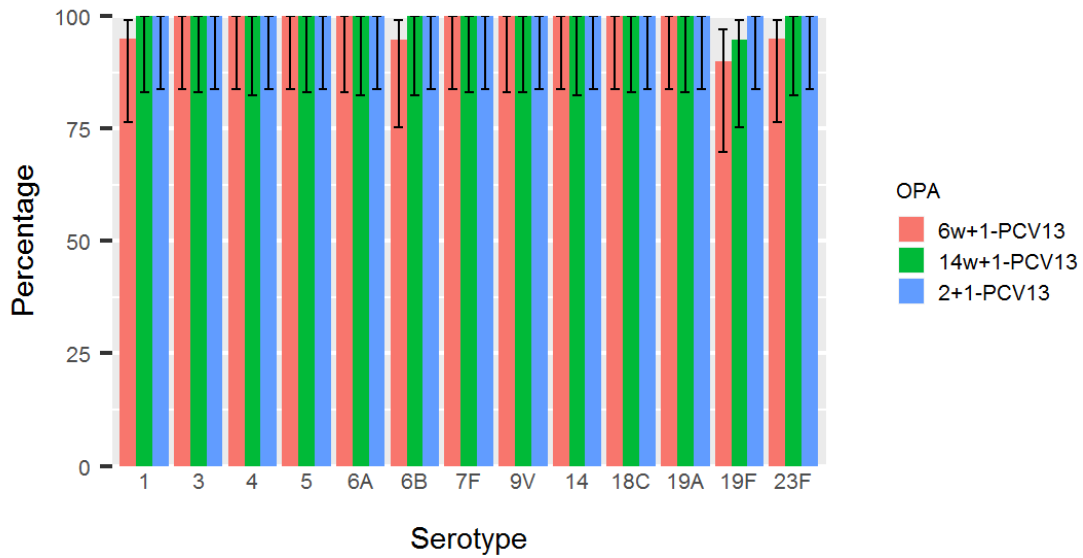

**Supplementary Figure 3b: PCV 10**

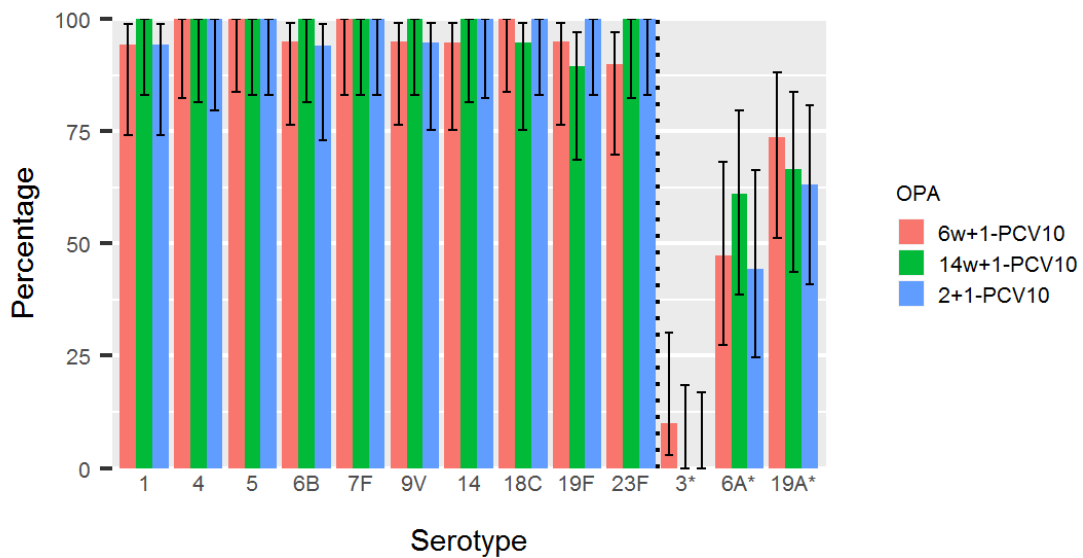

Footnote: Legend: 6 (6w+1-PCV10/13) or 14 weeks (14w+1-PCV10/13) refers to group who received a single PCV dose primary series at 6 and 14 weeks age, respectively; and 2+1-PCV refers to group who received a two-dose primary series at 6 and 14 weeks of age (2+1-PCV10/13).

\*Denotes serotypes included in 13-valent but not in 10-valent pneumococcal conjugate vaccine.

The corresponding raw data is available in Supplementary Table S3.

**Supplementary Figure 4: Serotype-specific IgG geometric mean antibody concentrations one-month following vaccination with a single dose at either six or 14 weeks of age, or two-dose primary series of 13-valent (Figure 1a) or 10-valent (Figure 1b) pneumococcal conjugate vaccine (PCV).**

**Supplementary Figure 4a: PCV13**

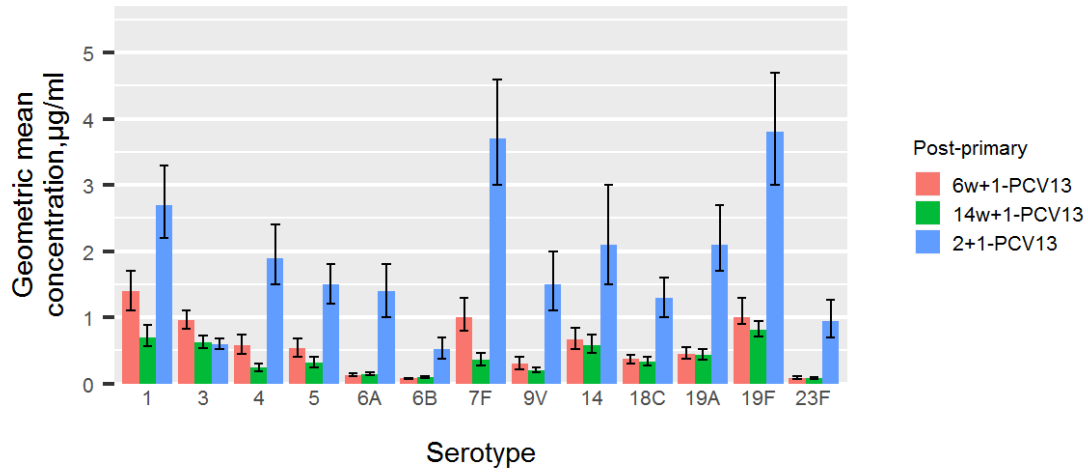

**Supplementary Figure 4b: PCV10**

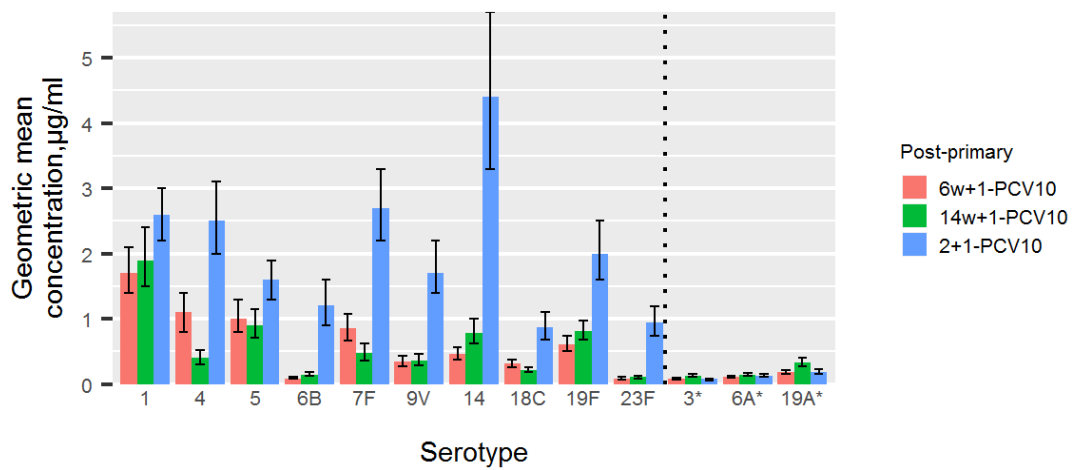

Supplementary Figure 5: Percentage of infants with serotype-specific IgG concentrations  $\geq 0.35 \mu\text{g/ml}$  immediately before the booster dose of 13-valent (Figure 1a) or 10-valent (Figure 1b) pneumococcal conjugate vaccine, following vaccination with a single dose at either six or 14 weeks of age, or two-dose primary series of PCV.

Supplementary Figure 5a: PCV13

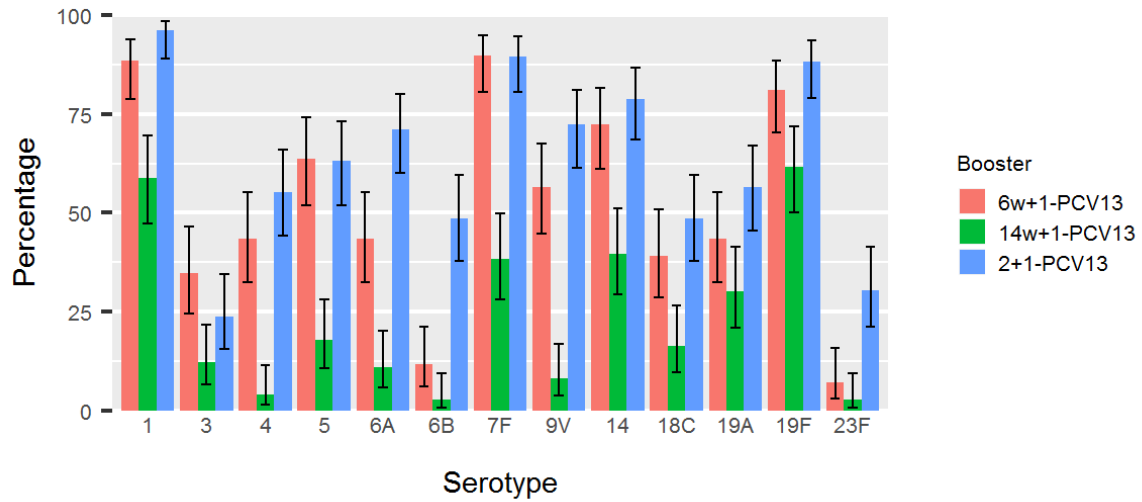

Suppl Figure 5b: PCV10

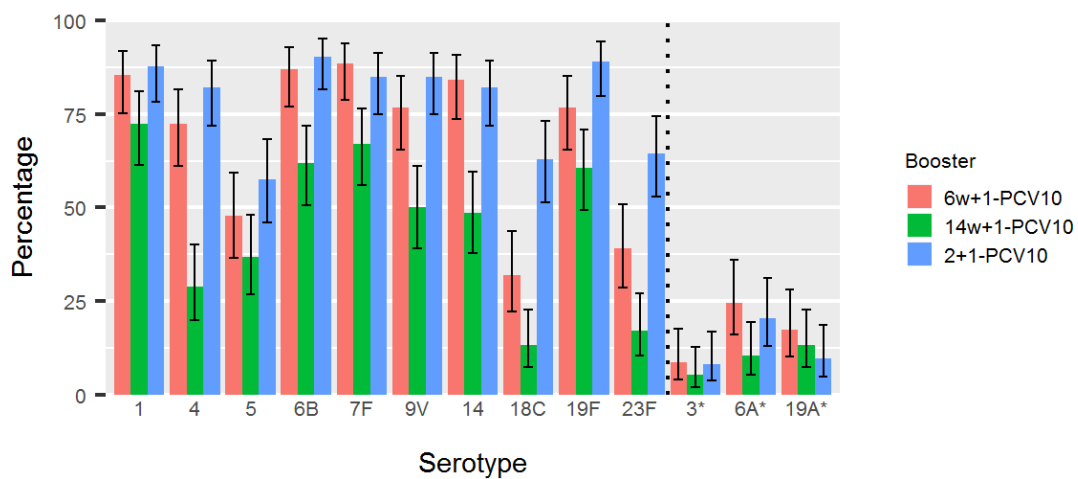



1. Andrews NJ, Waight PA, Burbidge P, et al. Serotype-specific effectiveness and correlates of protection for the 13-valent pneumococcal conjugate vaccine: a postlicensure indirect cohort study. *Lancet Infect Dis.* 2014;14(9):839-846.
2. Olwagen CP, Adrian PV, Madhi SA. Comparison of traditional culture and molecular qPCR for detection of simultaneous carriage of multiple pneumococcal serotypes in African children. *Sci Rep.* 2017;7(1):4628.
